# Supplementary material for: Association of Adverse Effects of Medical Treatment With Mortality in the United States: A Secondary Analysis of the Global Burden of Diseases, Injuries, and Risk Factors Study
Source: PubMed Central journal article supplement (PMC6484545; doi:10.1001/jamanetworkopen.2018.7041), 2019-01-18
Supplement: jamanetwopen-2-e187041-s001.pdf [file jamanetwopen-2-e187041-s001.pdf]

## Supplementary Online Content

Sunshine JE, Meo N, Kassebaum NJ, Collison ML, Mokdad AH, Naghavi M. Association of adverse effects of medical treatment with mortality in the United States: a secondary analysis of the Global Burden of Diseases, Injuries, and Risk Factors Study. *JAMA Netw Open*. 2019; 2(1):e187041. doi:0.1001/jamanetworkopen.2018.7041

**eTable 1.** *International Classification of Diseases, Ninth Revision (ICD-9)* Codes Included in the GBD 2016 Cause Category of Adverse Effects of Medical Treatment (AEMT)

**eTable 2.** *International Statistical Classification of Diseases and Related Health Problems, Tenth Revision (ICD-10)* Codes Included in the GBD 2016 Cause Category of Adverse Effects of Medical Treatment (AEMT)

**eTable 3.** Selected Cause-of-Death Ensemble Modeling (CODEm) Covariates Used to Generate the Adverse Effects of Medical Harm (AEMT) Models

**eTable 4.** Result of Redistribution of Garbage Codes on AEMT as Underlying Cause by Different Nonunderlying Cause by *ICD-9* and *ICD-10*

**eTable 5.** Frequency of Causes of Death in the Cause-of-Death (COD) Chain When Adverse Effects of Medical Treatment (AEMT) Is the Underlying Cause of Death, United States 1980-2014

**eTable 6.** Number of Each Subtype of AEMT by Year Where AEMT Was Certified as the Underlying Cause of Death, 1980 to 2014, Both Sexes Combined

**eTable 7.** Rate of Occurrence of AEMT in the Cause-of-Death Chain by Other Cause Category (per 1000 Deaths in Each Category) When AEMT Was NOT Certified as the Underlying Cause of Death, 1980 to 2014, Both Sexes Combined

**eMethods.**

**eReferences.**

This supplementary material has been provided by the authors to give readers additional information about their work.

**eTable 1. International Classification of Diseases, Ninth Revision (ICD-9) codes included in the GBD 2016 cause category of adverse effects of medical treatment (AEMT)**

| ICD-9 code | ICD-9 cause name                                              | AEMT sub-category                              |
|------------|---------------------------------------------------------------|------------------------------------------------|
| 244.0      | Postsurgical hypothyroidism                                   | 2 - Surgical and peri-operative adverse events |
| 244.1      | Other postablative hypothyroidism                             | 4 - Medical management                         |
| 244.3      | Other iatrogenic hypothyroidism                               | 6 - Other                                      |
| 244.8      | Other specified acquired hypothyroidism                       | 6 - Other                                      |
| 251.3      | Postsurgical hypoinsulinemia                                  | 2 - Surgical and peri-operative adverse events |
| 253.7      | Iatrogenic pituitary disorders                                | 6 - Other                                      |
| 331.81     | Reye's syndrome                                               | 1 - Adverse drug events                        |
| 349.0      | Reaction to spinal or lumbar puncture                         | 4 - Medical management                         |
| 349.1      | Nervous system complications from surgically implanted device | 5 - Medical or surgical devices                |
| 349.31     | Accidental puncture or laceration of dura during a procedure  | 3 - Misadventure                               |
| 357.6      | Polyneuropathy due to drugs                                   | 1 - Adverse drug events                        |
| 359.24     | Drug-induced myotonia                                         | 1 - Adverse drug events                        |
| 457.0      | Postmastectomy lymphedema syndrome                            | 2 - Surgical and peri-operative adverse events |
| 518.7      | Transfusion related acute lung injury (TRALI)                 | 4 - Medical management                         |
| 519.0      | Tracheostomy                                                  | 2 - Surgical and peri-operative adverse events |
| 519.00     | Tracheostomy complication, unspecified                        | 2 - Surgical and peri-operative adverse events |
| 519.01     | Infection of tracheostomy                                     | 2 - Surgical and peri-operative adverse events |
| 519.02     | Mechanical complication of tracheostomy                       | 2 - Surgical and peri-operative adverse events |
| 519.09     | Other tracheostomy complications                              | 2 - Surgical and peri-operative adverse events |
| 536.4      | Gastrostomy complications                                     | 2 - Surgical and peri-operative adverse events |
| 536.40     | Gastrostomy complication, unspecified                         | 2 - Surgical and peri-operative adverse events |
| 536.41     | Infection of gastrostomy                                      | 2 - Surgical and peri-operative adverse events |
| 536.42     | Mechanical complication of gastrostomy                        | 2 - Surgical and peri-operative adverse events |
| 536.49     | Other gastrostomy complications                               | 2 - Surgical and peri-operative adverse events |
| <b>539</b> | <b>Complications of bariatric procedures</b>                  | 2 - Surgical and peri-operative adverse events |
| 539.0      | Complications of gastric band procedure                       | 2 - Surgical and peri-operative adverse events |
| 539.01     | Infection due to gastric band procedure                       | 2 - Surgical and peri-operative adverse events |
| 539.09     | Other complications of gastric band procedure                 | 2 - Surgical and peri-operative adverse events |
| 539.8      | Complications of other bariatric procedure                    | 2 - Surgical and peri-operative adverse events |
| 539.81     | Infection due to other bariatric procedure                    | 2 - Surgical and peri-operative adverse events |
| 539.89     | Other complications of other bariatric procedure              | 2 - Surgical and peri-operative adverse events |
| 539.9      | Ventral hernia                                                | 2 - Surgical and peri-operative adverse events |
| 551.2      | Ventral hernia with gangrene                                  | 2 - Surgical and peri-operative adverse events |
| 551.20     | Ventral hernia, unspecified, with gangrene                    | 2 - Surgical and peri-operative adverse events |
| 551.21     | Incisional ventral hernia, with gangrene                      | 2 - Surgical and peri-operative adverse events |
| 551.29     | Other ventral hernia with gangrene                            | 2 - Surgical and peri-operative adverse events |
| 552.2      | Ventral hernia with obstruction                               | 2 - Surgical and peri-operative adverse events |
| 552.20     | Ventral, unspecified, hernia with obstruction                 | 2 - Surgical and peri-operative adverse events |
| 552.21     | Incisional ventral hernia with obstruction                    | 2 - Surgical and peri-operative adverse events |
| 552.29     | Other ventral hernia with obstruction                         | 2 - Surgical and peri-operative adverse events |
| 564.2      | Postgastric surgery syndromes                                 | 2 - Surgical and peri-operative adverse events |
| 564.3      | Vomiting following gastrointestinal surgery                   | 2 - Surgical and peri-operative adverse events |
| 564.4      | Other postoperative functional disorders                      | 2 - Surgical and peri-operative adverse events |
| 569.6      | Colostomy and enterostomy complications                       | 2 - Surgical and peri-operative adverse events |
| 569.60     | Colostomy and enterostomy complication, unspecified           | 2 - Surgical and peri-operative adverse events |
| 569.61     | Infection of colostomy or enterostomy                         | 2 - Surgical and peri-operative adverse events |
| 569.62     | Mechanical complication of colostomy and enterostomy          | 2 - Surgical and peri-operative adverse events |
| 569.69     | Other colostomy and enterostomy complication                  | 2 - Surgical and peri-operative adverse events |
| 579.3      | Other and unspecified postsurgical nonabsorption              | 2 - Surgical and peri-operative adverse events |
| 596.82     | Mechanical complication of cystostomy                         | 2 - Surgical and peri-operative adverse events |
| 596.83     | Other complication of cystostomy                              | 2 - Surgical and peri-operative adverse events |
| 598.2      | Postoperative urethral stricture                              | 2 - Surgical and peri-operative adverse events |
| 779.4      | Drug reactions and intoxications specific to newborn          | 1 - Adverse drug events                        |
| 779.5      | Drug withdrawal syndrome in newborn                           | 1 - Adverse drug events                        |
| 780.62     | Postprocedural fever                                          | 2 - Surgical and peri-operative adverse events |
| 780.63     | Postvaccination fever                                         | 1 - Adverse drug events                        |

|             |                                                                                                                         |                  |
|-------------|-------------------------------------------------------------------------------------------------------------------------|------------------|
| <b>E870</b> | <b>Accidental cut puncture perforation or hemorrhage during medical care</b>                                            | 3 - Misadventure |
| E870.0      | Accidental cut, puncture, perforation or hemorrhage during surgical operation                                           | 3 - Misadventure |
| E870.1      | Accidental cut, puncture, perforation or hemorrhage during infusion or transfusion                                      | 3 - Misadventure |
| E870.2      | Accidental cut, puncture, perforation or hemorrhage during kidney dialysis or other perfusion                           | 3 - Misadventure |
| E870.3      | Accidental cut, puncture, perforation or hemorrhage during injection or vaccination                                     | 3 - Misadventure |
| E870.4      | Accidental cut, puncture, perforation or hemorrhage during endoscopic examination                                       | 3 - Misadventure |
| E870.5      | Accidental cut, puncture, perforation or hemorrhage during aspiration of fluid or tissue, puncture, and catheterization | 3 - Misadventure |
| E870.6      | Accidental cut, puncture, perforation or hemorrhage during heart catheterization                                        | 3 - Misadventure |
| E870.7      | Accidental cut, puncture, perforation or hemorrhage during administration of enema                                      | 3 - Misadventure |
| E870.8      | Accidental cut, puncture, perforation or hemorrhage during other specified medical care                                 | 3 - Misadventure |
| E870.9      | Accidental cut, puncture, perforation or hemorrhage during unspecified medical care                                     | 3 - Misadventure |
| <b>E871</b> | <b>Foreign object left in body during procedure</b>                                                                     | 3 - Misadventure |
| E871.0      | Foreign object left in body during surgical operation                                                                   | 3 - Misadventure |
| E871.1      | Foreign object left in body during infusion or transfusion                                                              | 3 - Misadventure |
| E871.2      | Foreign object left in body during kidney dialysis or other perfusion                                                   | 3 - Misadventure |
| E871.3      | Foreign object left in body during injection or vaccination                                                             | 3 - Misadventure |
| E871.4      | Foreign object left in body during endoscopic examination                                                               | 3 - Misadventure |
| E871.5      | Foreign object left in body during aspiration of fluid or tissue, puncture, and catheterization                         | 3 - Misadventure |
| E871.6      | Foreign object left in body during heart catheterization                                                                | 3 - Misadventure |
| E871.7      | Foreign object left in body during removal of catheter or packing                                                       | 3 - Misadventure |
| E871.8      | Foreign object left in body during other specified procedures                                                           | 3 - Misadventure |
| E871.9      | Foreign object left in body during unspecified procedure                                                                | 3 - Misadventure |
| <b>E872</b> | <b>Failure of sterile precautions during procedure</b>                                                                  | 3 - Misadventure |
| E872.0      | Failure of sterile precautions during surgical operation                                                                | 3 - Misadventure |
| E872.1      | Failure of sterile precautions during infusion or transfusion                                                           | 3 - Misadventure |
| E872.2      | Failure of sterile precautions during kidney dialysis and other perfusion                                               | 3 - Misadventure |
| E872.3      | Failure of sterile precautions during injection or vaccination                                                          | 3 - Misadventure |
| E872.4      | Failure of sterile precautions during endoscopic examination                                                            | 3 - Misadventure |
| E872.5      | Failure of sterile precautions during aspiration of fluid or tissue, puncture, and catheterization                      | 3 - Misadventure |
| E872.6      | Failure of sterile precautions during heart catheterization                                                             | 3 - Misadventure |
| E872.8      | Failure of sterile precautions during other specified procedures                                                        | 3 - Misadventure |
| E872.9      | Failure of sterile precautions during unspecified procedure                                                             | 3 - Misadventure |
| <b>E873</b> | <b>Failure in dosage</b>                                                                                                | 3 - Misadventure |
| E873.0      | Excessive amount of blood or other fluid during transfusion or infusion                                                 | 3 - Misadventure |
| E873.1      | Incorrect dilution of fluid during infusion                                                                             | 3 - Misadventure |
| E873.2      | Overdose of radiation in therapy                                                                                        | 3 - Misadventure |
| E873.3      | Inadvertent exposure of patient to radiation during medical care                                                        | 3 - Misadventure |
| E873.4      | Failure in dosage in electroshock or insulin-shock therapy                                                              | 3 - Misadventure |
| E873.5      | Inappropriate [too hot or too cold] temperature in local application and packing                                        | 3 - Misadventure |
| E873.6      | Nonadministration of necessary drug or medicinal substance                                                              | 3 - Misadventure |
| E873.8      | Other specified failure in dosage                                                                                       | 3 - Misadventure |
| E873.9      | Unspecified failure in dosage                                                                                           | 3 - Misadventure |
| <b>E874</b> | <b>Mechanical failure of instrument or apparatus during procedure</b>                                                   | 3 - Misadventure |
| E874.0      | Mechanical failure of instrument or apparatus during surgical operation                                                 | 3 - Misadventure |
| E874.1      | Mechanical failure of instrument or apparatus during infusion and transfusion                                           | 3 - Misadventure |
| E874.2      | Mechanical failure of instrument or apparatus during kidney dialysis and other perfusion                                | 3 - Misadventure |
| E874.3      | Mechanical failure of instrument or apparatus during endoscopic examination                                             | 3 - Misadventure |
| E874.4      | Mechanical failure of instrument or apparatus during aspiration of fluid or tissue, puncture, and catheterization       | 3 - Misadventure |
| E874.5      | Mechanical failure of instrument or apparatus during heart catheterization                                              | 3 - Misadventure |
| E874.8      | Mechanical failure of instrument or apparatus during other specified procedures                                         | 3 - Misadventure |
| E874.9      | Mechanical failure of instrument or apparatus during unspecified procedure                                              | 3 - Misadventure |
| <b>E875</b> | <b>Contaminated or infected blood other fluid drug or biological substance</b>                                          | 3 - Misadventure |
| E875.0      | Contaminated substance transfused or infused                                                                            | 3 - Misadventure |
| E875.1      | Contaminated substance injected or used for vaccination                                                                 | 3 - Misadventure |
| E875.2      | Contaminated drug or biological substance administered by other means                                                   | 3 - Misadventure |

|             |                                                                                                                                                                                                                          |                                                |
|-------------|--------------------------------------------------------------------------------------------------------------------------------------------------------------------------------------------------------------------------|------------------------------------------------|
| E875.8      | Misadventure to patient from other contamination                                                                                                                                                                         | 3 - Misadventure                               |
| E875.9      | Misadventure to patient from unspecified contamination                                                                                                                                                                   | 3 - Misadventure                               |
| <b>E876</b> | <b>Other and unspecified misadventures during medical care</b>                                                                                                                                                           | 3 - Misadventure                               |
| E876.0      | Mismatched blood in transfusion                                                                                                                                                                                          | 3 - Misadventure                               |
| E876.1      | Wrong fluid in infusion                                                                                                                                                                                                  | 3 - Misadventure                               |
| E876.2      | Failure in suture and ligature during surgical operation                                                                                                                                                                 | 3 - Misadventure                               |
| E876.3      | Endotracheal tube wrongly placed during anesthetic procedure                                                                                                                                                             | 3 - Misadventure                               |
| E876.4      | Failure to introduce or to remove other tube or instrument                                                                                                                                                               | 3 - Misadventure                               |
| E876.5      | Performance of wrong operation (procedure) on correct patient                                                                                                                                                            | 3 - Misadventure                               |
| E876.6      | Performance of operation (procedure) on patient not scheduled for surgery                                                                                                                                                | 3 - Misadventure                               |
| E876.7      | Performance of correct operation (procedure) on wrong side/body part                                                                                                                                                     | 3 - Misadventure                               |
| E876.8      | Other specified misadventures during medical care                                                                                                                                                                        | 3 - Misadventure                               |
| E876.9      | Unspecified misadventure during medical care                                                                                                                                                                             | 3 - Misadventure                               |
| <b>E878</b> | <b>Surgical operation and other surgical procedures as the cause of abnormal reaction of patient or of later complication without mention of misadventure at the time of operation</b>                                   | 2 - Surgical and peri-operative adverse events |
| E878.0      | Surgical operation with transplant of whole organ causing abnormal patient reaction, or later complication, without mention of misadventure at time of operation                                                         | 2 - Surgical and peri-operative adverse events |
| E878.1      | Surgical operation with implant of artificial internal device causing abnormal patient reaction, or later complication, without mention of misadventure at time of operation                                             | 5 - Medical or surgical devices                |
| E878.2      | Surgical operation with anastomosis, bypass, or graft, with natural or artificial tissues used as implant causing abnormal patient reaction, or later complication, without mention of misadventure at time of operation | 2 - Surgical and peri-operative adverse events |
| E878.3      | Surgical operation with formation of external stoma causing abnormal patient reaction, or later complication, without mention of misadventure at time of operation                                                       | 2 - Surgical and peri-operative adverse events |
| E878.4      | Other restorative surgery causing abnormal patient reaction, or later complication, without mention of misadventure at time of operation                                                                                 | 2 - Surgical and peri-operative adverse events |
| E878.5      | Amputation of limb(s) causing abnormal patient reaction, or later complication, without mention of misadventure at time of operation                                                                                     | 2 - Surgical and peri-operative adverse events |
| E878.6      | Removal of other organ (partial) (total) causing abnormal patient reaction, or later complication, without mention of misadventure at time of operation                                                                  | 2 - Surgical and peri-operative adverse events |
| E878.8      | Other specified surgical operations and procedures causing abnormal patient reaction, or later complication, without mention of misadventure at time of operation                                                        | 2 - Surgical and peri-operative adverse events |
| E878.9      | Unspecified surgical operations and procedures causing abnormal patient reaction, or later complication, without mention of misadventure at time of operation                                                            | 2 - Surgical and peri-operative adverse events |
| <b>E879</b> | <b>Other procedures without mention of misadventure at the time of procedure as the cause of abnormal reaction of patient or of later complication</b>                                                                   | 4 - Medical management                         |
| E879.0      | Cardiac catheterization as the cause of abnormal reaction of patient, or of later complication, without mention of misadventure at time of procedure                                                                     | 2 - Surgical and peri-operative adverse events |
| E879.1      | Kidney dialysis as the cause of abnormal reaction of patient, or of later complication, without mention of misadventure at time of procedure                                                                             | 4 - Medical management                         |
| E879.2      | Radiological procedure and radiotherapy as the cause of abnormal reaction of patient, or of later complication, without mention of misadventure at time of procedure                                                     | 4 - Medical management                         |
| E879.3      | Shock therapy as the cause of abnormal reaction of patient, or of later complication, without mention of misadventure at time of procedure                                                                               | 4 - Medical management                         |
| E879.4      | Aspiration of fluid as the cause of abnormal reaction of patient, or of later complication, without mention of misadventure at time of procedure                                                                         | 4 - Medical management                         |
| E879.5      | Insertion of gastric or duodenal sound as the cause of abnormal reaction of patient, or of later complication, without mention of misadventure at time of procedure                                                      | 4 - Medical management                         |
| E879.6      | Urinary catheterization as the cause of abnormal reaction of patient, or of later complication, without mention of misadventure at time of procedure                                                                     | 4 - Medical management                         |
| E879.7      | Blood sampling as the cause of abnormal reaction of patient, or of later complication, without mention of misadventure at time of procedure                                                                              | 4 - Medical management                         |
| E879.8      | Other specified procedures as the cause of abnormal reaction of patient, or of later complication, without mention of misadventure at time of procedure                                                                  | 4 - Medical management                         |
| E879.9      | Unspecified procedure as the cause of abnormal reaction of patient, or of later complication, without mention of misadventure at time of procedure                                                                       | 4 - Medical management                         |
| <b>E930</b> | <b>Antibiotics causing adverse effects in therapeutic use</b>                                                                                                                                                            | 1 - Adverse drug events                        |
| E930.0      | Penicillins causing adverse effects in therapeutic use                                                                                                                                                                   | 1 - Adverse drug events                        |
| E930.1      | Antifungal antibiotics causing adverse effects in therapeutic use                                                                                                                                                        | 1 - Adverse drug events                        |
| E930.2      | Chloramphenicol group causing adverse effects in therapeutic use                                                                                                                                                         | 1 - Adverse drug events                        |
| E930.3      | Erythromycin and other macrolides causing adverse effects in therapeutic use                                                                                                                                             | 1 - Adverse drug events                        |
| E930.4      | Tetracycline group causing adverse effects in therapeutic use                                                                                                                                                            | 1 - Adverse drug events                        |

|             |                                                                                                     |                         |
|-------------|-----------------------------------------------------------------------------------------------------|-------------------------|
| E930.5      | Cephalosporin group causing adverse effects in therapeutic use                                      | 1 - Adverse drug events |
| E930.6      | Antimycobacterial antibiotics causing adverse effects in therapeutic use                            | 1 - Adverse drug events |
| E930.7      | Antineoplastic antibiotics causing adverse effects in therapeutic use                               | 1 - Adverse drug events |
| E930.8      | Other specified antibiotics causing adverse effects in therapeutic use                              | 1 - Adverse drug events |
| E930.9      | Unspecified antibiotic causing adverse effects in therapeutic use                                   | 1 - Adverse drug events |
| <b>E931</b> | <b>Other anti-infectives causing adverse effects in therapeutic use</b>                             | 1 - Adverse drug events |
| E931.0      | Sulfonamides causing adverse effects in therapeutic use                                             | 1 - Adverse drug events |
| E931.1      | Arsenical anti-infectives causing adverse effects in therapeutic use                                | 1 - Adverse drug events |
| E931.2      | Heavy metal anti-infectives causing adverse effects in therapeutic use                              | 1 - Adverse drug events |
| E931.3      | Quinoline and hydroxyquinoline derivatives causing adverse effects in therapeutic use               | 1 - Adverse drug events |
| E931.4      | Antimalarials and drugs acting on other blood protozoa causing adverse effects in therapeutic use   | 1 - Adverse drug events |
| E931.5      | Other antiprotozoal drugs causing adverse effects in therapeutic use                                | 1 - Adverse drug events |
| E931.6      | Anthelmintics causing adverse effects in therapeutic use                                            | 1 - Adverse drug events |
| E931.7      | Antiviral drugs causing adverse effects in therapeutic use                                          | 1 - Adverse drug events |
| E931.8      | Other antimycobacterial drugs causing adverse effects in therapeutic use                            | 1 - Adverse drug events |
| E931.9      | Other and unspecified anti-infectives causing adverse effects in therapeutic use                    | 1 - Adverse drug events |
| <b>E932</b> | <b>Hormones and synthetic substitutes causing adverse effects in therapeutic use</b>                | 1 - Adverse drug events |
| E932.0      | Adrenal cortical steroids causing adverse effects in therapeutic use                                | 1 - Adverse drug events |
| E932.1      | Androgens and anabolic congeners causing adverse effects in therapeutic use                         | 1 - Adverse drug events |
| E932.2      | Ovarian hormones and synthetic substitutes causing adverse effects in therapeutic use               | 1 - Adverse drug events |
| E932.3      | Insulins and antidiabetic agents causing adverse effects in therapeutic use                         | 1 - Adverse drug events |
| E932.4      | Anterior pituitary hormones causing adverse effects in therapeutic use                              | 1 - Adverse drug events |
| E932.5      | Posterior pituitary hormones causing adverse effects in therapeutic use                             | 1 - Adverse drug events |
| E932.6      | Parathyroid and parathyroid derivatives causing adverse effects in therapeutic use                  | 1 - Adverse drug events |
| E932.7      | Thyroid and thyroid derivatives causing adverse effects in therapeutic use                          | 1 - Adverse drug events |
| E932.8      | Antithyroid agents causing adverse effects in therapeutic use                                       | 1 - Adverse drug events |
| E932.9      | Other and unspecified hormones and synthetic substitutes causing adverse effects in therapeutic use | 1 - Adverse drug events |
| <b>E933</b> | <b>Primarily systemic agents causing adverse effects in therapeutic use</b>                         | 1 - Adverse drug events |
| E933.0      | Antiallergic and antiemetic drugs causing adverse effects in therapeutic use                        | 1 - Adverse drug events |
| E933.1      | Antineoplastic and immunosuppressive drugs causing adverse effects in therapeutic use               | 1 - Adverse drug events |
| E933.2      | Acidifying agents causing adverse effects in therapeutic use                                        | 1 - Adverse drug events |
| E933.3      | Alkalinizing agents causing adverse effects in therapeutic use                                      | 1 - Adverse drug events |
| E933.4      | Enzymes, not elsewhere classified, causing adverse effects in therapeutic use                       | 1 - Adverse drug events |
| E933.5      | Vitamins, not elsewhere classified, causing adverse effects in therapeutic use                      | 1 - Adverse drug events |
| E933.6      | Oral bisphosphonates                                                                                | 1 - Adverse drug events |
| E933.7      | Intravenous bisphosphonates                                                                         | 1 - Adverse drug events |
| E933.8      | Other systemic agents, not elsewhere classified, causing adverse effects in therapeutic use         | 1 - Adverse drug events |
| E933.9      | Unspecified systemic agent causing adverse effects in therapeutic use                               | 1 - Adverse drug events |
| <b>E934</b> | <b>Agents primarily affecting blood constituents causing adverse effects in therapeutic use</b>     | 1 - Adverse drug events |
| E934.0      | Iron and its compounds causing adverse effects in therapeutic use                                   | 1 - Adverse drug events |
| E934.1      | Liver preparations and other antianemic agents causing adverse effects in therapeutic use           | 1 - Adverse drug events |
| E934.2      | Anticoagulants causing adverse effects in therapeutic use                                           | 1 - Adverse drug events |
| E934.3      | Vitamin k [phytonadione] causing adverse effects in therapeutic use                                 | 1 - Adverse drug events |
| E934.4      | Fibrinolysis-affecting drugs causing adverse effects in therapeutic use                             | 1 - Adverse drug events |
| E934.5      | Anticoagulant antagonists and other coagulants causing adverse effects in therapeutic use           | 1 - Adverse drug events |
| E934.6      | Gamma globulin causing adverse effects in therapeutic use                                           | 1 - Adverse drug events |
| E934.7      | Natural blood and blood products causing adverse effects in therapeutic use                         | 1 - Adverse drug events |
| E934.8      | Other agents affecting blood constituents causing adverse effects in therapeutic use                | 1 - Adverse drug events |
| E934.9      | Unspecified agent affecting blood constituents causing adverse effects in therapeutic use           | 1 - Adverse drug events |
| <b>E935</b> | <b>Analgesics antipyretics and antirheumatics causing adverse effects in therapeutic use</b>        | 1 - Adverse drug events |
| E935.0      | Heroin causing adverse effects in therapeutic use                                                   | 1 - Adverse drug events |
| E935.1      | Methadone causing adverse effects in therapeutic use                                                | 1 - Adverse drug events |
| E935.2      | Other opiates and related narcotics causing adverse effects in therapeutic use                      | 1 - Adverse drug events |
| E935.3      | Salicylates causing adverse effects in therapeutic use                                              | 1 - Adverse drug events |

|             |                                                                                                                       |                                                |
|-------------|-----------------------------------------------------------------------------------------------------------------------|------------------------------------------------|
| E935.4      | Aromatic analgesics, not elsewhere classified, causing adverse effects in therapeutic use                             | 1 - Adverse drug events                        |
| E935.5      | Pyrazole derivatives causing adverse effects in therapeutic use                                                       | 1 - Adverse drug events                        |
| E935.6      | Antirheumatics [antiphlogistics] causing adverse effects in therapeutic use                                           | 1 - Adverse drug events                        |
| E935.7      | Other non-narcotic analgesics causing adverse effects in therapeutic use                                              | 1 - Adverse drug events                        |
| E935.8      | Other specified analgesics and antipyretics causing adverse effects in therapeutic use                                | 1 - Adverse drug events                        |
| E935.9      | Unspecified analgesic and antipyretic causing adverse effects in therapeutic use                                      | 1 - Adverse drug events                        |
| <b>E936</b> | <b>Anticonvulsants and anti-parkinsonism drugs causing adverse effects in therapeutic use</b>                         | 1 - Adverse drug events                        |
| E936.0      | Oxazolidine derivatives causing adverse effects in therapeutic use                                                    | 1 - Adverse drug events                        |
| E936.1      | Hydantoin derivatives causing adverse effects in therapeutic use                                                      | 1 - Adverse drug events                        |
| E936.2      | Succinimides causing adverse effects in therapeutic use                                                               | 1 - Adverse drug events                        |
| E936.3      | Other and unspecified anticonvulsants causing adverse effects in therapeutic use                                      | 1 - Adverse drug events                        |
| E936.4      | Anti-parkinsonism drugs causing adverse effects in therapeutic use                                                    | 1 - Adverse drug events                        |
| <b>E937</b> | <b>Sedatives and hypnotics causing adverse effects in therapeutic use</b>                                             | 1 - Adverse drug events                        |
| E937.0      | Barbiturates causing adverse effects in therapeutic use                                                               | 1 - Adverse drug events                        |
| E937.1      | Chloral hydrate group causing adverse effects in therapeutic use                                                      | 1 - Adverse drug events                        |
| E937.2      | Paraldehyde causing adverse effects in therapeutic use                                                                | 1 - Adverse drug events                        |
| E937.3      | Bromine compounds causing adverse effects in therapeutic use                                                          | 1 - Adverse drug events                        |
| E937.4      | Methaqualone compounds causing adverse effects in therapeutic use                                                     | 1 - Adverse drug events                        |
| E937.5      | Glutethimide group causing adverse effects in therapeutic use                                                         | 1 - Adverse drug events                        |
| E937.6      | Mixed sedatives, not elsewhere classified, causing adverse effects in therapeutic use                                 | 1 - Adverse drug events                        |
| E937.8      | Other sedatives and hypnotics causing adverse effects in therapeutic use                                              | 1 - Adverse drug events                        |
| E937.9      | Unspecified sedatives and hypnotics causing adverse effects in therapeutic use                                        | 1 - Adverse drug events                        |
| <b>E938</b> | <b>Other central nervous system depressants and anesthetics causing adverse effects in therapeutic use</b>            | 1 - Adverse drug events                        |
| E938.0      | Central nervous system muscle-tone depressants causing adverse effects in therapeutic use                             | 2 - Surgical and peri-operative adverse events |
| E938.1      | Halothane causing adverse effects in therapeutic use                                                                  | 2 - Surgical and peri-operative adverse events |
| E938.2      | Other gaseous anesthetics causing adverse effects in therapeutic use                                                  | 2 - Surgical and peri-operative adverse events |
| E938.3      | Intravenous anesthetics causing adverse effects in therapeutic use                                                    | 2 - Surgical and peri-operative adverse events |
| E938.4      | Other and unspecified general anesthetics causing adverse effects in therapeutic use                                  | 2 - Surgical and peri-operative adverse events |
| E938.5      | Surface and infiltration anesthetics causing adverse effects in therapeutic use                                       | 2 - Surgical and peri-operative adverse events |
| E938.6      | Peripheral nerve- and plexus-blocking anesthetics causing adverse effects in therapeutic use                          | 2 - Surgical and peri-operative adverse events |
| E938.7      | Spinal anesthetics causing adverse effects in therapeutic use                                                         | 2 - Surgical and peri-operative adverse events |
| E938.9      | Other and unspecified local anesthetics causing adverse effects in therapeutic use                                    | 2 - Surgical and peri-operative adverse events |
| <b>E939</b> | <b>Psychotropic agents causing adverse effects in therapeutic use</b>                                                 | 1 - Adverse drug events                        |
| E939.0      | Antidepressants causing adverse effects in therapeutic use                                                            | 1 - Adverse drug events                        |
| E939.1      | Phenothiazine-based tranquilizers causing adverse effects in therapeutic use                                          | 1 - Adverse drug events                        |
| E939.2      | Butyrophenone-based tranquilizers causing adverse effects in therapeutic use                                          | 1 - Adverse drug events                        |
| E939.3      | Other antipsychotics, neuroleptics, and major tranquilizers causing adverse effects in therapeutic use                | 1 - Adverse drug events                        |
| E939.4      | Benzodiazepine-based tranquilizers causing adverse effects in therapeutic use                                         | 1 - Adverse drug events                        |
| E939.5      | Other tranquilizers causing adverse effects in therapeutic use                                                        | 1 - Adverse drug events                        |
| E939.6      | Psychodysleptics [hallucinogens] causing adverse effects in therapeutic use                                           | 1 - Adverse drug events                        |
| E939.7      | Psychostimulants causing adverse effects in therapeutic use                                                           | 1 - Adverse drug events                        |
| E939.8      | Other psychotropic agents causing adverse effects in therapeutic use                                                  | 1 - Adverse drug events                        |
| E939.9      | Unspecified psychotropic agent causing adverse effects in therapeutic use                                             | 1 - Adverse drug events                        |
| <b>E940</b> | <b>Central nervous system stimulants causing adverse effects in therapeutic use</b>                                   | 1 - Adverse drug events                        |
| E940.0      | Analeptics causing adverse effects in therapeutic use                                                                 | 1 - Adverse drug events                        |
| E940.1      | Opiate antagonists causing adverse effects in therapeutic use                                                         | 1 - Adverse drug events                        |
| E940.8      | Other specified central nervous system stimulants causing adverse effects in therapeutic use                          | 1 - Adverse drug events                        |
| E940.9      | Unspecified central nervous system stimulant causing adverse effects in therapeutic use                               | 1 - Adverse drug events                        |
| <b>E941</b> | <b>Drugs primarily affecting the autonomic nervous system causing adverse effects in therapeutic use</b>              | 1 - Adverse drug events                        |
| E941.0      | Parasympathomimetics [cholinergics] causing adverse effects in therapeutic use                                        | 1 - Adverse drug events                        |
| E941.1      | Parasympatholytics [anticholinergics and antimuscarinics] and spasmolytics causing adverse effects in therapeutic use | 1 - Adverse drug events                        |
| E941.2      | Sympathomimetics [adrenergics] causing adverse effects in therapeutic use                                             | 1 - Adverse drug events                        |

|             |                                                                                                                                               |                         |
|-------------|-----------------------------------------------------------------------------------------------------------------------------------------------|-------------------------|
| E941.3      | Sympatholytics [antiadrenergics] causing adverse effects in therapeutic use                                                                   | 1 - Adverse drug events |
| E941.9      | Unspecified drug primarily affecting the autonomic nervous system causing adverse effects in therapeutic use                                  | 1 - Adverse drug events |
| <b>E942</b> | <b>Agents primarily affecting the cardiovascular system causing adverse effects in therapeutic use</b>                                        | 1 - Adverse drug events |
| E942.0      | Cardiac rhythm regulators causing adverse effects in therapeutic use                                                                          | 1 - Adverse drug events |
| E942.1      | Cardiotonic glycosides and drugs of similar action causing adverse effects in therapeutic use                                                 | 1 - Adverse drug events |
| E942.2      | Antilipemic and antiarteriosclerotic drugs causing adverse effects in therapeutic use                                                         | 1 - Adverse drug events |
| E942.3      | Ganglion-blocking agents causing adverse effects in therapeutic use                                                                           | 1 - Adverse drug events |
| E942.4      | Coronary vasodilators causing adverse effects in therapeutic use                                                                              | 1 - Adverse drug events |
| E942.5      | Other vasodilators causing adverse effects in therapeutic use                                                                                 | 1 - Adverse drug events |
| E942.6      | Other antihypertensive agents causing adverse effects in therapeutic use                                                                      | 1 - Adverse drug events |
| E942.7      | Antivascular drugs, including sclerosing agents, causing adverse effects in therapeutic use                                                   | 1 - Adverse drug events |
| E942.8      | Capillary-active drugs causing adverse effects in therapeutic use                                                                             | 1 - Adverse drug events |
| E942.9      | Other and unspecified agents primarily affecting the cardiovascular system causing adverse effects in therapeutic use                         | 1 - Adverse drug events |
| <b>E943</b> | <b>Agents primarily affecting gastrointestinal system causing adverse effects in therapeutic use</b>                                          | 1 - Adverse drug events |
| E943.0      | Antacids and antigastric secretion drugs causing adverse effects in therapeutic use                                                           | 1 - Adverse drug events |
| E943.1      | Irritant cathartics causing adverse effects in therapeutic use                                                                                | 1 - Adverse drug events |
| E943.2      | Emollient cathartics causing adverse effects in therapeutic use                                                                               | 1 - Adverse drug events |
| E943.3      | Other cathartics, including intestinal atonia drugs, causing adverse effects in therapeutic use                                               | 1 - Adverse drug events |
| E943.4      | Digestants causing adverse effects in therapeutic use                                                                                         | 1 - Adverse drug events |
| E943.5      | Antidiarrheal drugs causing adverse effects in therapeutic use                                                                                | 1 - Adverse drug events |
| E943.6      | Emetics causing adverse effects in therapeutic use                                                                                            | 1 - Adverse drug events |
| E943.8      | Other specified agents primarily affecting the gastro-intestinal system causing adverse effects in therapeutic use                            | 1 - Adverse drug events |
| E943.9      | Unspecified agent primarily affecting the gastrointestinal system causing adverse effects in therapeutic use                                  | 1 - Adverse drug events |
| <b>E944</b> | <b>Water mineral and uric acid metabolism drugs causing adverse effects in therapeutic use</b>                                                | 1 - Adverse drug events |
| E944.0      | Mercurial diuretics causing adverse effects in therapeutic use                                                                                | 1 - Adverse drug events |
| E944.1      | Purine derivative diuretics causing adverse effects in therapeutic use                                                                        | 1 - Adverse drug events |
| E944.2      | Carbonic acid anhydrase inhibitors causing adverse effects in therapeutic use                                                                 | 1 - Adverse drug events |
| E944.3      | Saluretics causing adverse effects in therapeutic use                                                                                         | 1 - Adverse drug events |
| E944.4      | Other diuretics causing adverse effects in therapeutic use                                                                                    | 1 - Adverse drug events |
| E944.5      | Electrolytic, caloric, and water-balance agents causing adverse effects in therapeutic use                                                    | 1 - Adverse drug events |
| E944.6      | Other mineral salts, not elsewhere classified, causing adverse effects in therapeutic use                                                     | 1 - Adverse drug events |
| E944.7      | Uric acid metabolism drugs causing adverse effects in therapeutic use                                                                         | 1 - Adverse drug events |
| <b>E945</b> | <b>Agents primarily acting on the smooth and skeletal muscles and respiratory system causing adverse effects in therapeutic use</b>           | 1 - Adverse drug events |
| E945.0      | Oxytocic agents causing adverse effects in therapeutic use                                                                                    | 1 - Adverse drug events |
| E945.1      | Smooth muscle relaxants causing adverse effects in therapeutic use                                                                            | 1 - Adverse drug events |
| E945.2      | Skeletal muscle relaxants causing adverse effects in therapeutic use                                                                          | 1 - Adverse drug events |
| E945.3      | Other and unspecified drugs acting on muscles causing adverse effects in therapeutic use                                                      | 1 - Adverse drug events |
| E945.4      | Antitussives causing adverse effects in therapeutic use                                                                                       | 1 - Adverse drug events |
| E945.5      | Expectorants causing adverse effects in therapeutic use                                                                                       | 1 - Adverse drug events |
| E945.6      | Anti-common cold drugs causing adverse effects in therapeutic use                                                                             | 1 - Adverse drug events |
| E945.7      | Antiasthmatics causing adverse effects in therapeutic use                                                                                     | 1 - Adverse drug events |
| E945.8      | Other and unspecified respiratory drugs causing adverse effects in therapeutic use                                                            | 1 - Adverse drug events |
| <b>E946</b> | <b>Agents primarily affecting skin and mucous membrane otorhinolaryngological and dental drugs causing adverse effects in therapeutic use</b> | 1 - Adverse drug events |
| E946.0      | Local anti-infectives and anti-inflammatory drugs causing adverse effects in therapeutic use                                                  | 1 - Adverse drug events |
| E946.1      | Antipruritics causing adverse effects in therapeutic use                                                                                      | 1 - Adverse drug events |
| E946.2      | Local astringents and local detergents causing adverse effects in therapeutic use                                                             | 1 - Adverse drug events |
| E946.3      | Emollients, demulcents, and protectants causing adverse effects in therapeutic use                                                            | 1 - Adverse drug events |

|             |                                                                                                                                            |                         |
|-------------|--------------------------------------------------------------------------------------------------------------------------------------------|-------------------------|
| E946.4      | Keratolytics, keratoplastics, other hair treatment drugs and preparations causing adverse effects in therapeutic use                       | 1 - Adverse drug events |
| E946.5      | Eye anti-infectives and other eye drugs causing adverse effects in therapeutic use                                                         | 1 - Adverse drug events |
| E946.6      | Anti-infectives and other drugs and preparations for ear, nose, and throat causing adverse effects in therapeutic use                      | 1 - Adverse drug events |
| E946.7      | Dental drugs topically applied causing adverse effects in therapeutic use                                                                  | 1 - Adverse drug events |
| E946.8      | Other agents primarily affecting skin and mucous membrane causing adverse effects in therapeutic use                                       | 1 - Adverse drug events |
| E946.9      | Unspecified agent primarily affecting skin and mucous membrane causing adverse effects in therapeutic use                                  | 1 - Adverse drug events |
| <b>E947</b> | <b>Other and unspecified drugs and medicinal substances causing adverse effects in therapeutic use</b>                                     | 1 - Adverse drug events |
| E947.0      | Dietetics causing adverse effects in therapeutic use                                                                                       | 1 - Adverse drug events |
| E947.1      | Lipotropic drugs causing adverse effects in therapeutic use                                                                                | 1 - Adverse drug events |
| E947.2      | Antidotes and chelating agents, not elsewhere classified, causing adverse effects in therapeutic use                                       | 1 - Adverse drug events |
| E947.3      | Alcohol deterrents causing adverse effects in therapeutic use                                                                              | 1 - Adverse drug events |
| E947.4      | Pharmaceutical excipients causing adverse effects in therapeutic use                                                                       | 1 - Adverse drug events |
| E947.8      | Other drugs and medicinal substances causing adverse effects in therapeutic use                                                            | 1 - Adverse drug events |
| E947.9      | Unspecified drug or medicinal substance causing adverse effects in therapeutic use                                                         | 1 - Adverse drug events |
| <b>E948</b> | <b>Bacterial vaccines causing adverse effects in therapeutic use</b>                                                                       | 1 - Adverse drug events |
| E948.0      | Bcg vaccine causing adverse effects in therapeutic use                                                                                     | 1 - Adverse drug events |
| E948.1      | Typhoid and paratyphoid vaccines causing adverse effects in therapeutic use                                                                | 1 - Adverse drug events |
| E948.2      | Cholera vaccine causing adverse effects in therapeutic use                                                                                 | 1 - Adverse drug events |
| E948.3      | Plague vaccine causing adverse effects in therapeutic use                                                                                  | 1 - Adverse drug events |
| E948.4      | Tetanus vaccine causing adverse effects in therapeutic use                                                                                 | 1 - Adverse drug events |
| E948.5      | Diphtheria vaccine causing adverse effects in therapeutic use                                                                              | 1 - Adverse drug events |
| E948.6      | Pertussis vaccine, including combinations with a pertussis component, causing adverse effects in therapeutic use                           | 1 - Adverse drug events |
| E948.8      | Other and unspecified bacterial vaccines causing adverse effects in therapeutic use                                                        | 1 - Adverse drug events |
| E948.9      | Mixed bacterial vaccines, except combinations with a pertussis component, causing adverse effects in therapeutic use                       | 1 - Adverse drug events |
| <b>E949</b> | <b>Other vaccines and biological substances causing adverse effects in therapeutic use</b>                                                 | 1 - Adverse drug events |
| E949.0      | Smallpox vaccine causing adverse effects in therapeutic use                                                                                | 1 - Adverse drug events |
| E949.1      | Rabies vaccine causing adverse effects in therapeutic use                                                                                  | 1 - Adverse drug events |
| E949.2      | Typhus vaccine causing adverse effects in therapeutic use                                                                                  | 1 - Adverse drug events |
| E949.3      | Yellow fever vaccine causing adverse effects in therapeutic use                                                                            | 1 - Adverse drug events |
| E949.4      | Measles vaccine causing adverse effects in therapeutic use                                                                                 | 1 - Adverse drug events |
| E949.5      | Poliomyelitis vaccine causing adverse effects in therapeutic use                                                                           | 1 - Adverse drug events |
| E949.6      | Other and unspecified viral and rickettsial vaccines causing adverse effects in therapeutic use                                            | 1 - Adverse drug events |
| E949.7      | Mixed viral-rickettsial and bacterial vaccines, except combinations with a pertussis component, causing adverse effects in therapeutic use | 1 - Adverse drug events |
| E949.9      | Other and unspecified vaccines and biological substances causing adverse effects in therapeutic use                                        | 1 - Adverse drug events |



**eTable 2. International Statistical Classification of Diseases and Related Health Problems, Tenth Revision (ICD-10) codes included in the GBD 2016 cause category of adverse effects of medical treatment (AEMT)**

| ICD-10 code | ICD-10 cause name                                                                                                          | AEMT sub-category                                     |
|-------------|----------------------------------------------------------------------------------------------------------------------------|-------------------------------------------------------|
| D52.1       | Drug-induced folate deficiency anemia                                                                                      | 1 - Adverse drug events                               |
| D59.0       | Drug-induced autoimmune hemolytic anemia                                                                                   | 1 - Adverse drug events                               |
| D59.2       | Drug-induced nonautoimmune hemolytic anemia                                                                                | 1 - Adverse drug events                               |
| D59.6       | Hemoglobinuria due to hemolysis from other external causes                                                                 | 6 - Other                                             |
| D69.5       | Secondary thrombocytopenia                                                                                                 | 6 - Other                                             |
| D69.51      | Posttransfusion purpura                                                                                                    | 4 - Medical management                                |
| D69.59      | Other secondary thrombocytopenia                                                                                           | 6 - Other                                             |
| <b>D78</b>  | <b>Intraoperative and postprocedural complications of the spleen</b>                                                       | <b>2 - Surgical and peri-operative adverse events</b> |
| D78.0       | Intraoperative hemorrhage and hematoma of the spleen complicating a procedure                                              | 2 - Surgical and peri-operative adverse events        |
| D78.01      | Intraoperative hemorrhage and hematoma of the spleen complicating a procedure on the spleen                                | 2 - Surgical and peri-operative adverse events        |
| D78.02      | Intraoperative hemorrhage and hematoma of the spleen complicating other procedure                                          | 2 - Surgical and peri-operative adverse events        |
| D78.1       | Accidental puncture and laceration of the spleen during a procedure                                                        | 3 - Misadventure                                      |
| D78.11      | Accidental puncture and laceration of the spleen during a procedure on the spleen                                          | 3 - Misadventure                                      |
| D78.12      | Accidental puncture and laceration of the spleen during other procedure                                                    | 3 - Misadventure                                      |
| D78.2       | Postprocedural hemorrhage and hematoma of the spleen following a procedure                                                 | 2 - Surgical and peri-operative adverse events        |
| D78.21      | Postprocedural hemorrhage and hematoma of the spleen following a procedure on the spleen                                   | 2 - Surgical and peri-operative adverse events        |
| D78.22      | Postprocedural hemorrhage and hematoma of the spleen following other procedure                                             | 2 - Surgical and peri-operative adverse events        |
| D78.8       | Other intraoperative and postprocedural complications of the spleen                                                        | 2 - Surgical and peri-operative adverse events        |
| D78.81      | Other intraoperative complications of the spleen                                                                           | 2 - Surgical and peri-operative adverse events        |
| D78.89      | Other postprocedural complications of the spleen                                                                           | 2 - Surgical and peri-operative adverse events        |
| E03.2       | Hypothyroidism due to medicaments and other exogenous substances                                                           | 1 - Adverse drug events                               |
| E06.4       | Drug-induced thyroiditis                                                                                                   | 1 - Adverse drug events                               |
| <b>E09</b>  | <b>Drug or chemical induced diabetes mellitus</b>                                                                          | <b>1 - Adverse drug events</b>                        |
| E09.0       | Drug or chemical induced diabetes mellitus with hyperosmolarity                                                            | 1 - Adverse drug events                               |
| E09.00      | Drug or chemical induced diabetes mellitus with hyperosmolarity without nonketotic hyperglycemic-hyperosmolar coma (NKHHC) | 1 - Adverse drug events                               |
| E09.01      | Drug or chemical induced diabetes mellitus with hyperosmolarity with coma                                                  | 1 - Adverse drug events                               |
| E09.1       | Drug or chemical induced diabetes mellitus with ketoacidosis                                                               | 1 - Adverse drug events                               |
| E09.10      | Drug or chemical induced diabetes mellitus with ketoacidosis without coma                                                  | 1 - Adverse drug events                               |
| E09.11      | Drug or chemical induced diabetes mellitus with ketoacidosis with coma                                                     | 1 - Adverse drug events                               |
| E09.2       | Drug or chemical induced diabetes mellitus with kidney complications                                                       | 1 - Adverse drug events                               |
| E09.21      | Drug or chemical induced diabetes mellitus with diabetic nephropathy                                                       | 1 - Adverse drug events                               |
| E09.22      | Drug or chemical induced diabetes mellitus with diabetic chronic kidney disease                                            | 1 - Adverse drug events                               |
| E09.29      | Drug or chemical induced diabetes mellitus with other diabetic kidney complication                                         | 1 - Adverse drug events                               |
| E09.3       | Drug or chemical induced diabetes mellitus with ophthalmic complications                                                   | 1 - Adverse drug events                               |
| E09.31      | Drug or chemical induced diabetes mellitus with unspecified diabetic retinopathy                                           | 1 - Adverse drug events                               |
| E09.311     | Drug or chemical induced diabetes mellitus with unspecified diabetic retinopathy with macular edema                        | 1 - Adverse drug events                               |
| E09.319     | Drug or chemical induced diabetes mellitus with unspecified diabetic retinopathy without macular edema                     | 1 - Adverse drug events                               |
| E09.32      | Drug or chemical induced diabetes mellitus with mild nonproliferative diabetic retinopathy                                 | 1 - Adverse drug events                               |
| E09.321     | Drug or chemical induced diabetes mellitus with mild nonproliferative diabetic retinopathy with macular edema              | 1 - Adverse drug events                               |
| E09.329     | Drug or chemical induced diabetes mellitus with mild nonproliferative diabetic retinopathy without macular edema           | 1 - Adverse drug events                               |
| E09.33      | Drug or chemical induced diabetes mellitus with moderate nonproliferative diabetic retinopathy                             | 1 - Adverse drug events                               |

|            |                                                                                                                             |                                               |
|------------|-----------------------------------------------------------------------------------------------------------------------------|-----------------------------------------------|
| E09.331    | Drug or chemical induced diabetes mellitus with moderate nonproliferative diabetic retinopathy with macular edema           | 1 - Adverse drug events                       |
| E09.339    | Drug or chemical induced diabetes mellitus with moderate nonproliferative diabetic retinopathy without macular edema        | 1 - Adverse drug events                       |
| E09.34     | Drug or chemical induced diabetes mellitus with severe nonproliferative diabetic retinopathy                                | 1 - Adverse drug events                       |
| E09.341    | Drug or chemical induced diabetes mellitus with severe nonproliferative diabetic retinopathy with macular edema             | 1 - Adverse drug events                       |
| E09.349    | Drug or chemical induced diabetes mellitus with severe nonproliferative diabetic retinopathy without macular edema          | 1 - Adverse drug events                       |
| E09.35     | Drug or chemical induced diabetes mellitus with proliferative diabetic retinopathy                                          | 1 - Adverse drug events                       |
| E09.351    | Drug or chemical induced diabetes mellitus with proliferative diabetic retinopathy with macular edema                       | 1 - Adverse drug events                       |
| E09.359    | Drug or chemical induced diabetes mellitus with proliferative diabetic retinopathy without macular edema                    | 1 - Adverse drug events                       |
| E09.36     | Drug or chemical induced diabetes mellitus with diabetic cataract                                                           | 1 - Adverse drug events                       |
| E09.39     | Drug or chemical induced diabetes mellitus with other diabetic ophthalmic complication                                      | 1 - Adverse drug events                       |
| E09.4      | Drug or chemical induced diabetes mellitus with neurological complications                                                  | 1 - Adverse drug events                       |
| E09.40     | Drug or chemical induced diabetes mellitus with neurological complications with diabetic neuropathy, unspecified            | 1 - Adverse drug events                       |
| E09.41     | Drug or chemical induced diabetes mellitus with neurological complications with diabetic mononeuropathy                     | 1 - Adverse drug events                       |
| E09.42     | Drug or chemical induced diabetes mellitus with neurological complications with diabetic polyneuropathy                     | 1 - Adverse drug events                       |
| E09.43     | Drug or chemical induced diabetes mellitus with neurological complications with diabetic autonomic (poly)neuropathy         | 1 - Adverse drug events                       |
| E09.44     | Drug or chemical induced diabetes mellitus with neurological complications with diabetic amyotrophy                         | 1 - Adverse drug events                       |
| E09.49     | Drug or chemical induced diabetes mellitus with neurological complications with other diabetic neurological complication    | 1 - Adverse drug events                       |
| E09.5      | Drug or chemical induced diabetes mellitus with circulatory complications                                                   | 1 - Adverse drug events                       |
| E09.51     | Drug or chemical induced diabetes mellitus with diabetic peripheral angiopathy without gangrene                             | 1 - Adverse drug events                       |
| E09.52     | Drug or chemical induced diabetes mellitus with diabetic peripheral angiopathy with gangrene                                | 1 - Adverse drug events                       |
| E09.59     | Drug or chemical induced diabetes mellitus with other circulatory complications                                             | 1 - Adverse drug events                       |
| E09.6      | Drug or chemical induced diabetes mellitus with other specified complications                                               | 1 - Adverse drug events                       |
| E09.61     | Drug or chemical induced diabetes mellitus with diabetic arthropathy                                                        | 1 - Adverse drug events                       |
| E09.610    | Drug or chemical induced diabetes mellitus with diabetic neuropathic arthropathy                                            | 1 - Adverse drug events                       |
| E09.618    | Drug or chemical induced diabetes mellitus with other diabetic arthropathy                                                  | 1 - Adverse drug events                       |
| E09.62     | Drug or chemical induced diabetes mellitus with skin complications                                                          | 1 - Adverse drug events                       |
| E09.620    | Drug or chemical induced diabetes mellitus with diabetic dermatitis                                                         | 1 - Adverse drug events                       |
| E09.621    | Drug or chemical induced diabetes mellitus with foot ulcer                                                                  | 1 - Adverse drug events                       |
| E09.622    | Drug or chemical induced diabetes mellitus with other skin ulcer                                                            | 1 - Adverse drug events                       |
| E09.628    | Drug or chemical induced diabetes mellitus with other skin complications                                                    | 1 - Adverse drug events                       |
| E09.63     | Drug or chemical induced diabetes mellitus with oral complications                                                          | 1 - Adverse drug events                       |
| E09.630    | Drug or chemical induced diabetes mellitus with periodontal disease                                                         | 1 - Adverse drug events                       |
| E09.638    | Drug or chemical induced diabetes mellitus with other oral complications                                                    | 1 - Adverse drug events                       |
| E09.64     | Drug or chemical induced diabetes mellitus with hypoglycemia                                                                | 1 - Adverse drug events                       |
| E09.641    | Drug or chemical induced diabetes mellitus with hypoglycemia with coma                                                      | 1 - Adverse drug events                       |
| E09.649    | Drug or chemical induced diabetes mellitus with hypoglycemia without coma                                                   | 1 - Adverse drug events                       |
| E09.65     | Drug or chemical induced diabetes mellitus with hyperglycemia                                                               | 1 - Adverse drug events                       |
| E09.69     | Drug or chemical induced diabetes mellitus with other specified complication                                                | 1 - Adverse drug events                       |
| E09.8      | Drug or chemical induced diabetes mellitus with unspecified complications                                                   | 1 - Adverse drug events                       |
| E09.9      | Drug or chemical induced diabetes mellitus without complications                                                            | 1 - Adverse drug events                       |
| E16.0      | Drug-induced hypoglycemia without coma                                                                                      | 1 - Adverse drug events                       |
| E23.1      | Drug-induced hypopituitarism                                                                                                | 1 - Adverse drug events                       |
| E24.2      | Drug-induced Cushing's syndrome                                                                                             | 1 - Adverse drug events                       |
| E27.3      | Drug-induced adrenocortical insufficiency                                                                                   | 1 - Adverse drug events                       |
| <b>E36</b> | <b>Intraoperative complications of endocrine system</b>                                                                     | 2 - Surgical and perioperative adverse events |
| <b>E36</b> | <b>Intraoperative complications of endocrine system</b>                                                                     | 2 - Surgical and perioperative adverse events |
| E36.0      | Intraoperative hemorrhage and hematoma of an endocrine system organ or structure complicating a procedure                   | 2 - Surgical and perioperative adverse events |
| E36.01     | Intraoperative hemorrhage and hematoma of an endocrine system organ or structure complicating an endocrine system procedure | 2 - Surgical and perioperative adverse events |

|            |                                                                                                                   |                                                |
|------------|-------------------------------------------------------------------------------------------------------------------|------------------------------------------------|
| E36.02     | Intraoperative hemorrhage and hematoma of an endocrine system organ or structure complicating other procedure     | 2 - Surgical and peri-operative adverse events |
| E36.1      | Accidental puncture and laceration of an endocrine system organ or structure during a procedure                   | 3 - Misadventure                               |
| E36.11     | Accidental puncture and laceration of an endocrine system organ or structure during an endocrine system procedure | 3 - Misadventure                               |
| E36.12     | Accidental puncture and laceration of an endocrine system organ or structure during other procedure               | 3 - Misadventure                               |
| E36.8      | Other intraoperative complications of endocrine system                                                            | 2 - Surgical and peri-operative adverse events |
| E66.1      | Drug-induced obesity                                                                                              | 1 - Adverse drug events                        |
| E87.71     | Transfusion associated circulatory overload                                                                       | 4 - Medical management                         |
| <b>E89</b> | <b>Postprocedural endocrine and metabolic complications and disorders, not elsewhere classified</b>               | 2 - Surgical and peri-operative adverse events |
| E89.0      | Postprocedural hypothyroidism                                                                                     | 2 - Surgical and peri-operative adverse events |
| E89.00     | Postprocedural endocrine and metabolic complications and disorders, not elsewhere classified                      | 2 - Surgical and peri-operative adverse events |
| E89.01     | Postprocedural endocrine and metabolic complications and disorders, not elsewhere classified                      | 2 - Surgical and peri-operative adverse events |
| E89.02     | Postprocedural endocrine and metabolic complications and disorders, not elsewhere classified                      | 2 - Surgical and peri-operative adverse events |
| E89.03     | Postprocedural endocrine and metabolic complications and disorders, not elsewhere classified                      | 2 - Surgical and peri-operative adverse events |
| E89.08     | Postprocedural endocrine and metabolic complications and disorders, not elsewhere classified                      | 2 - Surgical and peri-operative adverse events |
| E89.09     | Postprocedural endocrine and metabolic complications and disorders, not elsewhere classified                      | 2 - Surgical and peri-operative adverse events |
| E89.1      | Postprocedural hypoinsulinemia                                                                                    | 2 - Surgical and peri-operative adverse events |
| E89.10     | Postprocedural endocrine and metabolic complications and disorders, not elsewhere classified                      | 2 - Surgical and peri-operative adverse events |
| E89.11     | Postprocedural endocrine and metabolic complications and disorders, not elsewhere classified                      | 2 - Surgical and peri-operative adverse events |
| E89.12     | Postprocedural endocrine and metabolic complications and disorders, not elsewhere classified                      | 2 - Surgical and peri-operative adverse events |
| E89.13     | Postprocedural endocrine and metabolic complications and disorders, not elsewhere classified                      | 2 - Surgical and peri-operative adverse events |
| E89.18     | Postprocedural endocrine and metabolic complications and disorders, not elsewhere classified                      | 2 - Surgical and peri-operative adverse events |
| E89.19     | Postprocedural endocrine and metabolic complications and disorders, not elsewhere classified                      | 2 - Surgical and peri-operative adverse events |
| E89.2      | Postprocedural hypoparathyroidism                                                                                 | 2 - Surgical and peri-operative adverse events |
| E89.3      | Postprocedural hypopituitarism                                                                                    | 2 - Surgical and peri-operative adverse events |
| E89.30     | Postprocedural endocrine and metabolic complications and disorders, not elsewhere classified                      | 2 - Surgical and peri-operative adverse events |
| E89.32     | Postprocedural endocrine and metabolic complications and disorders, not elsewhere classified                      | 2 - Surgical and peri-operative adverse events |
| E89.38     | Postprocedural endocrine and metabolic complications and disorders, not elsewhere classified                      | 2 - Surgical and peri-operative adverse events |
| E89.39     | Postprocedural endocrine and metabolic complications and disorders, not elsewhere classified                      | 2 - Surgical and peri-operative adverse events |
| E89.4      | Postprocedural ovarian failure                                                                                    | 2 - Surgical and peri-operative adverse events |
| E89.40     | Asymptomatic postprocedural ovarian failure                                                                       | 2 - Surgical and peri-operative adverse events |
| E89.41     | Symptomatic postprocedural ovarian failure                                                                        | 2 - Surgical and peri-operative adverse events |
| E89.5      | Postprocedural testicular hypofunction                                                                            | 2 - Surgical and peri-operative adverse events |
| E89.6      | Postprocedural adrenocortical (-medullary) hypofunction                                                           | 2 - Surgical and peri-operative adverse events |
| E89.7      | Postprocedural endocrine and metabolic complications and disorders, not elsewhere classified                      | 2 - Surgical and peri-operative adverse events |

|            |                                                                                                                          |                                                |
|------------|--------------------------------------------------------------------------------------------------------------------------|------------------------------------------------|
| E89.8      | Other postprocedural endocrine and metabolic complications and disorders                                                 | 2 - Surgical and peri-operative adverse events |
| E89.80     | Postprocedural endocrine and metabolic complications and disorders, not elsewhere classified                             | 2 - Surgical and peri-operative adverse events |
| E89.81     | Postprocedural hemorrhage and hematoma of an endocrine system organ or structure following a procedure                   | 2 - Surgical and peri-operative adverse events |
| E89.810    | Postprocedural hemorrhage and hematoma of an endocrine system organ or structure following an endocrine system procedure | 2 - Surgical and peri-operative adverse events |
| E89.811    | Postprocedural hemorrhage and hematoma of an endocrine system organ or structure following other procedure               | 2 - Surgical and peri-operative adverse events |
| E89.89     | Other postprocedural endocrine and metabolic complications and disorders                                                 | 2 - Surgical and peri-operative adverse events |
| E89.9      | Postprocedural endocrine and metabolic complications and disorders, not elsewhere classified                             | 2 - Surgical and peri-operative adverse events |
| G21.1      | Other drug-induced secondary parkinsonism                                                                                | 1 - Adverse drug events                        |
| G21.11     | Neuroleptic induced parkinsonism                                                                                         | 1 - Adverse drug events                        |
| G21.19     | Other drug induced secondary parkinsonism                                                                                | 1 - Adverse drug events                        |
| G24.0      | Drug induced dystonia                                                                                                    | 1 - Adverse drug events                        |
| G24.01     | Drug induced subacute dyskinesia                                                                                         | 1 - Adverse drug events                        |
| G24.02     | Drug induced acute dystonia                                                                                              | 1 - Adverse drug events                        |
| G24.09     | Other drug induced dystonia                                                                                              | 1 - Adverse drug events                        |
| G25.1      | Drug-induced tremor                                                                                                      | 1 - Adverse drug events                        |
| G25.4      | Drug-induced chorea                                                                                                      | 1 - Adverse drug events                        |
| G25.6      | Drug induced tics and other tics of organic origin                                                                       | 1 - Adverse drug events                        |
| G25.61     | Drug induced tics                                                                                                        | 1 - Adverse drug events                        |
| G25.69     | Other tics of organic origin                                                                                             | 6 - Other                                      |
| G25.7      | Other and unspecified drug induced movement disorders                                                                    | 1 - Adverse drug events                        |
| G25.70     | Drug induced movement disorder, unspecified                                                                              | 1 - Adverse drug events                        |
| G25.71     | Drug induced akathisia                                                                                                   | 1 - Adverse drug events                        |
| G25.79     | Other drug induced movement disorders                                                                                    | 1 - Adverse drug events                        |
| G72.0      | Drug-induced myopathy                                                                                                    | 1 - Adverse drug events                        |
| G93.7      | Reye's syndrome                                                                                                          | 1 - Adverse drug events                        |
| <b>G97</b> | <b>Intraoperative and postprocedural complications and disorders of nervous system, not elsewhere classified</b>         | 2 - Surgical and peri-operative adverse events |
| G97.0      | Cerebrospinal fluid leak from spinal puncture                                                                            | 2 - Surgical and peri-operative adverse events |
| G97.1      | Other reaction to spinal and lumbar puncture                                                                             | 2 - Surgical and peri-operative adverse events |
| G97.2      | Intracranial hypotension following ventricular shunting                                                                  | 2 - Surgical and peri-operative adverse events |
| G97.3      | Intraoperative hemorrhage and hematoma of a nervous system organ or structure complicating a procedure                   | 2 - Surgical and peri-operative adverse events |
| G97.31     | Intraoperative hemorrhage and hematoma of a nervous system organ or structure complicating a nervous system procedure    | 2 - Surgical and peri-operative adverse events |
| G97.32     | Intraoperative hemorrhage and hematoma of a nervous system organ or structure complicating other procedure               | 2 - Surgical and peri-operative adverse events |
| G97.4      | Accidental puncture and laceration of a nervous system organ or structure during a procedure                             | 3 - Misadventure                               |
| G97.41     | Accidental puncture or laceration of dura during a procedure                                                             | 3 - Misadventure                               |
| G97.48     | Accidental puncture and laceration of other nervous system organ or structure during a nervous system procedure          | 3 - Misadventure                               |
| G97.49     | Accidental puncture and laceration of other nervous system organ or structure during other procedure                     | 3 - Misadventure                               |
| G97.5      | Postprocedural hemorrhage and hematoma of a nervous system organ or structure following a procedure                      | 2 - Surgical and peri-operative adverse events |
| G97.51     | Postprocedural hemorrhage and hematoma of a nervous system organ or structure following a nervous system procedure       | 2 - Surgical and peri-operative adverse events |
| G97.52     | Postprocedural hemorrhage and hematoma of a nervous system organ or structure following other procedure                  | 2 - Surgical and peri-operative adverse events |
| G97.8      | Other intraoperative and postprocedural complications and disorders of nervous system                                    | 2 - Surgical and peri-operative adverse events |
| G97.81     | Other intraoperative complications of nervous system                                                                     | 2 - Surgical and peri-operative adverse events |
| G97.82     | Other postprocedural complications and disorders of nervous system                                                       | 2 - Surgical and peri-operative adverse events |

|            |                                                                                                                                   |                                                |
|------------|-----------------------------------------------------------------------------------------------------------------------------------|------------------------------------------------|
| G97.9      | Postprocedural disorder of nervous system, unspecified                                                                            | 2 - Surgical and peri-operative adverse events |
| 195.2      | Hypotension due to drugs                                                                                                          | 1 - Adverse drug events                        |
| 195.3      | Hypotension of hemodialysis                                                                                                       | 4 - Medical management                         |
| <b>197</b> | <b>Intraoperative and postprocedural complications and disorders of circulatory system, not elsewhere classified</b>              | 2 - Surgical and peri-operative adverse events |
| 197.0      | Postcardiotomy syndrome                                                                                                           | 2 - Surgical and peri-operative adverse events |
| 197.1      | Other postprocedural cardiac functional disturbances                                                                              | 2 - Surgical and peri-operative adverse events |
| 197.11     | Postprocedural cardiac insufficiency                                                                                              | 2 - Surgical and peri-operative adverse events |
| 197.110    | Postprocedural cardiac insufficiency following cardiac surgery                                                                    | 2 - Surgical and peri-operative adverse events |
| 197.111    | Postprocedural cardiac insufficiency following other surgery                                                                      | 2 - Surgical and peri-operative adverse events |
| 197.12     | Postprocedural cardiac arrest                                                                                                     | 2 - Surgical and peri-operative adverse events |
| 197.120    | Postprocedural cardiac arrest following cardiac surgery                                                                           | 2 - Surgical and peri-operative adverse events |
| 197.121    | Postprocedural cardiac arrest following other surgery                                                                             | 2 - Surgical and peri-operative adverse events |
| 197.13     | Postprocedural heart failure                                                                                                      | 2 - Surgical and peri-operative adverse events |
| 197.130    | Postprocedural heart failure following cardiac surgery                                                                            | 2 - Surgical and peri-operative adverse events |
| 197.131    | Postprocedural heart failure following other surgery                                                                              | 2 - Surgical and peri-operative adverse events |
| 197.19     | Other postprocedural cardiac functional disturbances                                                                              | 2 - Surgical and peri-operative adverse events |
| 197.190    | Other postprocedural cardiac functional disturbances following cardiac surgery                                                    | 2 - Surgical and peri-operative adverse events |
| 197.191    | Other postprocedural cardiac functional disturbances following other surgery                                                      | 2 - Surgical and peri-operative adverse events |
| 197.2      | Postmastectomy lymphedema syndrome                                                                                                | 2 - Surgical and peri-operative adverse events |
| 197.3      | Postprocedural hypertension                                                                                                       | 2 - Surgical and peri-operative adverse events |
| 197.4      | Intraoperative hemorrhage and hematoma of a circulatory system organ or structure complicating a procedure                        | 2 - Surgical and peri-operative adverse events |
| 197.41     | Intraoperative hemorrhage and hematoma of a circulatory system organ or structure complicating a circulatory system procedure     | 2 - Surgical and peri-operative adverse events |
| 197.410    | Intraoperative hemorrhage and hematoma of a circulatory system organ or structure complicating a cardiac catheterization          | 2 - Surgical and peri-operative adverse events |
| 197.411    | Intraoperative hemorrhage and hematoma of a circulatory system organ or structure complicating a cardiac bypass                   | 2 - Surgical and peri-operative adverse events |
| 197.418    | Intraoperative hemorrhage and hematoma of a circulatory system organ or structure complicating other circulatory system procedure | 2 - Surgical and peri-operative adverse events |
| 197.42     | Intraoperative hemorrhage and hematoma of a circulatory system organ or structure complicating other procedure                    | 2 - Surgical and peri-operative adverse events |
| 197.5      | Accidental puncture and laceration of a circulatory system organ or structure during a procedure                                  | 3 - Misadventure                               |
| 197.51     | Accidental puncture and laceration of a circulatory system organ or structure during a circulatory system procedure               | 3 - Misadventure                               |
| 197.52     | Accidental puncture and laceration of a circulatory system organ or structure during other procedure                              | 3 - Misadventure                               |
| 197.6      | Postprocedural hemorrhage and hematoma of a circulatory system organ or structure following a procedure                           | 2 - Surgical and peri-operative adverse events |
| 197.61     | Postprocedural hemorrhage and hematoma of a circulatory system organ or structure following a circulatory system procedure        | 2 - Surgical and peri-operative adverse events |
| 197.610    | Postprocedural hemorrhage and hematoma of a circulatory system organ or structure following a cardiac catheterization             | 2 - Surgical and peri-operative adverse events |
| 197.611    | Postprocedural hemorrhage and hematoma of a circulatory system organ or structure following cardiac bypass                        | 2 - Surgical and peri-operative adverse events |
| 197.618    | Postprocedural hemorrhage and hematoma of a circulatory system organ or structure following other circulatory system procedure    | 2 - Surgical and peri-operative adverse events |

|            |                                                                                                                         |                                                |
|------------|-------------------------------------------------------------------------------------------------------------------------|------------------------------------------------|
| 197.62     | Postprocedural hemorrhage and hematoma of a circulatory system organ or structure following other procedure             | 2 - Surgical and peri-operative adverse events |
| 197.7      | Intraoperative cardiac functional disturbances                                                                          | 2 - Surgical and peri-operative adverse events |
| 197.71     | Intraoperative cardiac arrest                                                                                           | 2 - Surgical and peri-operative adverse events |
| 197.710    | Intraoperative cardiac arrest during cardiac surgery                                                                    | 2 - Surgical and peri-operative adverse events |
| 197.711    | Intraoperative cardiac arrest during other surgery                                                                      | 2 - Surgical and peri-operative adverse events |
| 197.79     | Other intraoperative cardiac functional disturbances                                                                    | 2 - Surgical and peri-operative adverse events |
| 197.790    | Other intraoperative cardiac functional disturbances during cardiac surgery                                             | 2 - Surgical and peri-operative adverse events |
| 197.791    | Other intraoperative cardiac functional disturbances during other surgery                                               | 2 - Surgical and peri-operative adverse events |
| 197.8      | Other intraoperative and postprocedural complications and disorders of the circulatory system, not elsewhere classified | 2 - Surgical and peri-operative adverse events |
| 197.81     | Intraoperative cerebrovascular infarction                                                                               | 2 - Surgical and peri-operative adverse events |
| 197.810    | Intraoperative cerebrovascular infarction during cardiac surgery                                                        | 2 - Surgical and peri-operative adverse events |
| 197.811    | Intraoperative cerebrovascular infarction during other surgery                                                          | 2 - Surgical and peri-operative adverse events |
| 197.82     | Postprocedural cerebrovascular infarction                                                                               | 2 - Surgical and peri-operative adverse events |
| 197.820    | Postprocedural cerebrovascular infarction during cardiac surgery                                                        | 2 - Surgical and peri-operative adverse events |
| 197.821    | Postprocedural cerebrovascular infarction during other surgery                                                          | 2 - Surgical and peri-operative adverse events |
| 197.88     | Other intraoperative complications of the circulatory system, not elsewhere classified                                  | 2 - Surgical and peri-operative adverse events |
| 197.89     | Other postprocedural complications and disorders of the circulatory system, not elsewhere classified                    | 2 - Surgical and peri-operative adverse events |
| 197.9      | Postprocedural disorder of circulatory system, unspecified                                                              | 2 - Surgical and peri-operative adverse events |
| 198.9      |                                                                                                                         | 2 - Surgical and peri-operative adverse events |
| J70.2      | Acute drug-induced interstitial lung disorders                                                                          | 1 - Adverse drug events                        |
| J70.3      | Chronic drug-induced interstitial lung disorders                                                                        | 1 - Adverse drug events                        |
| J70.4      | Drug-induced interstitial lung disorders, unspecified                                                                   | 1 - Adverse drug events                        |
| J70.5      | Respiratory conditions due to smoke inhalation                                                                          | 6 - Other                                      |
| <b>J95</b> | <b>Intraoperative and postprocedural complications and disorders of respiratory system, not elsewhere classified</b>    | 2 - Surgical and peri-operative adverse events |
| J95.0      | Tracheostomy complications                                                                                              | 2 - Surgical and peri-operative adverse events |
| J95.00     | Unspecified tracheostomy complication                                                                                   | 2 - Surgical and peri-operative adverse events |
| J95.01     | Hemorrhage from tracheostomy stoma                                                                                      | 2 - Surgical and peri-operative adverse events |
| J95.02     | Infection of tracheostomy stoma                                                                                         | 2 - Surgical and peri-operative adverse events |
| J95.03     | Malfunction of tracheostomy stoma                                                                                       | 2 - Surgical and peri-operative adverse events |
| J95.04     | Tracheo-esophageal fistula following tracheostomy                                                                       | 2 - Surgical and peri-operative adverse events |
| J95.09     | Other tracheostomy complication                                                                                         | 2 - Surgical and peri-operative adverse events |
| J95.1      | Acute pulmonary insufficiency following thoracic surgery                                                                | 2 - Surgical and peri-operative adverse events |
| J95.2      | Acute pulmonary insufficiency following nonthoracic surgery                                                             | 2 - Surgical and peri-operative adverse events |
| J95.3      | Chronic pulmonary insufficiency following surgery                                                                       | 2 - Surgical and peri-operative adverse events |

|            |                                                                                                                               |                                                |
|------------|-------------------------------------------------------------------------------------------------------------------------------|------------------------------------------------|
| J95.4      | Chemical pneumonitis due to anesthesia                                                                                        | 2 - Surgical and peri-operative adverse events |
| J95.5      | Postprocedural subglottic stenosis                                                                                            | 2 - Surgical and peri-operative adverse events |
| J95.6      | Intraoperative hemorrhage and hematoma of a respiratory system organ or structure complicating a procedure                    | 2 - Surgical and peri-operative adverse events |
| J95.61     | Intraoperative hemorrhage and hematoma of a respiratory system organ or structure complicating a respiratory system procedure | 2 - Surgical and peri-operative adverse events |
| J95.62     | Intraoperative hemorrhage and hematoma of a respiratory system organ or structure complicating other procedure                | 2 - Surgical and peri-operative adverse events |
| J95.7      | Accidental puncture and laceration of a respiratory system organ or structure during a procedure                              | 3 - Misadventure                               |
| J95.71     | Accidental puncture and laceration of a respiratory system organ or structure during a respiratory system procedure           | 3 - Misadventure                               |
| J95.72     | Accidental puncture and laceration of a respiratory system organ or structure during other procedure                          | 3 - Misadventure                               |
| J95.8      | Other intraoperative and postprocedural complications and disorders of respiratory system, not elsewhere classified           | 2 - Surgical and peri-operative adverse events |
| J95.81     | Postprocedural pneumothorax and air leak                                                                                      | 2 - Surgical and peri-operative adverse events |
| J95.811    | Postprocedural pneumothorax                                                                                                   | 2 - Surgical and peri-operative adverse events |
| J95.812    | Postprocedural air leak                                                                                                       | 2 - Surgical and peri-operative adverse events |
| J95.82     | Postprocedural respiratory failure                                                                                            | 2 - Surgical and peri-operative adverse events |
| J95.821    | Acute postprocedural respiratory failure                                                                                      | 2 - Surgical and peri-operative adverse events |
| J95.822    | Acute and chronic postprocedural respiratory failure                                                                          | 2 - Surgical and peri-operative adverse events |
| J95.83     | Postprocedural hemorrhage and hematoma of a respiratory system organ or structure following a procedure                       | 2 - Surgical and peri-operative adverse events |
| J95.830    | Postprocedural hemorrhage and hematoma of a respiratory system organ or structure following a respiratory system procedure    | 2 - Surgical and peri-operative adverse events |
| J95.831    | Postprocedural hemorrhage and hematoma of a respiratory system organ or structure following other procedure                   | 2 - Surgical and peri-operative adverse events |
| J95.84     | Transfusion-related acute lung injury (TRALI)                                                                                 | 4 - Medical management                         |
| J95.85     | Complication of respirator [ventilator]                                                                                       | 4 - Medical management                         |
| J95.850    | Mechanical complication of respirator                                                                                         | 4 - Medical management                         |
| J95.851    | Ventilator associated pneumonia                                                                                               | 4 - Medical management                         |
| J95.859    | Other complication of respirator [ventilator]                                                                                 | 4 - Medical management                         |
| J95.88     | Other intraoperative complications of respiratory system, not elsewhere classified                                            | 2 - Surgical and peri-operative adverse events |
| J95.89     | Other postprocedural complications and disorders of respiratory system, not elsewhere classified                              | 2 - Surgical and peri-operative adverse events |
| J95.9      | Postprocedural respiratory disorder, unspecified                                                                              | 2 - Surgical and peri-operative adverse events |
| <b>K43</b> | <b>Ventral hernia</b>                                                                                                         | 2 - Surgical and peri-operative adverse events |
| K43.0      | Incisional hernia with obstruction, without gangrene                                                                          | 2 - Surgical and peri-operative adverse events |
| K43.1      | Incisional hernia with gangrene                                                                                               | 2 - Surgical and peri-operative adverse events |
| K43.2      | Incisional hernia without obstruction or gangrene                                                                             | 2 - Surgical and peri-operative adverse events |
| K43.3      | Parastomal hernia with obstruction, without gangrene                                                                          | 2 - Surgical and peri-operative adverse events |
| K43.4      | Parastomal hernia with gangrene                                                                                               | 2 - Surgical and peri-operative adverse events |
| K43.5      | Parastomal hernia without obstruction or gangrene                                                                             | 2 - Surgical and peri-operative adverse events |
| K43.6      | Other and unspecified ventral hernia with obstruction, without gangrene                                                       | 2 - Surgical and peri-operative adverse events |
| K43.7      | Other and unspecified ventral hernia with gangrene                                                                            | 2 - Surgical and peri-operative adverse events |

|            |                                                                                                                           |                                                |
|------------|---------------------------------------------------------------------------------------------------------------------------|------------------------------------------------|
| K43.9      | Ventral hernia without obstruction or gangrene                                                                            | 2 - Surgical and peri-operative adverse events |
| K62.7      | Radiation proctitis                                                                                                       | 4 - Medical management                         |
| <b>K91</b> | <b>Intraoperative and postprocedural complications and disorders of digestive system, not elsewhere classified</b>        | 2 - Surgical and peri-operative adverse events |
| K91.0      | Vomiting following gastrointestinal surgery                                                                               | 2 - Surgical and peri-operative adverse events |
| K91.1      | Postgastric surgery syndromes                                                                                             | 2 - Surgical and peri-operative adverse events |
| K91.2      | Postsurgical malabsorption, not elsewhere classified                                                                      | 2 - Surgical and peri-operative adverse events |
| K91.3      | Postprocedural intestinal obstruction                                                                                     | 2 - Surgical and peri-operative adverse events |
| K91.4      | Colostomy and enterostomy malfunction                                                                                     | 2 - Surgical and peri-operative adverse events |
| K91.5      | Postcholecystectomy syndrome                                                                                              | 2 - Surgical and peri-operative adverse events |
| K91.6      | Intraoperative hemorrhage and hematoma of a digestive system organ or structure complicating a procedure                  | 2 - Surgical and peri-operative adverse events |
| K91.61     | Intraoperative hemorrhage and hematoma of a digestive system organ or structure complicating a digestive system procedure | 2 - Surgical and peri-operative adverse events |
| K91.62     | Intraoperative hemorrhage and hematoma of a digestive system organ or structure complicating other procedure              | 2 - Surgical and peri-operative adverse events |
| K91.7      | Accidental puncture and laceration of a digestive system organ or structure during a procedure                            | 3 - Misadventure                               |
| K91.71     | Accidental puncture and laceration of a digestive system organ or structure during a digestive system procedure           | 3 - Misadventure                               |
| K91.72     | Accidental puncture and laceration of a digestive system organ or structure during other procedure                        | 3 - Misadventure                               |
| K91.8      | Other intraoperative and postprocedural complications and disorders of digestive system                                   | 2 - Surgical and peri-operative adverse events |
| K91.81     | Other intraoperative complications of digestive system                                                                    | 2 - Surgical and peri-operative adverse events |
| K91.82     | Postprocedural hepatic failure                                                                                            | 2 - Surgical and peri-operative adverse events |
| K91.83     | Postprocedural hepatorenal syndrome                                                                                       | 2 - Surgical and peri-operative adverse events |
| K91.84     | Postprocedural hemorrhage and hematoma of a digestive system organ or structure following a procedure                     | 2 - Surgical and peri-operative adverse events |
| K91.840    | Postprocedural hemorrhage and hematoma of a digestive system organ or structure following a digestive system procedure    | 2 - Surgical and peri-operative adverse events |
| K91.841    | Postprocedural hemorrhage and hematoma of a digestive system organ or structure following other procedure                 | 2 - Surgical and peri-operative adverse events |
| K91.85     | Complications of intestinal pouch                                                                                         | 2 - Surgical and peri-operative adverse events |
| K91.850    | Pouchitis                                                                                                                 | 2 - Surgical and peri-operative adverse events |
| K91.858    | Other complications of intestinal pouch                                                                                   | 2 - Surgical and peri-operative adverse events |
| K91.86     | Retained cholelithiasis following cholecystectomy                                                                         | 2 - Surgical and peri-operative adverse events |
| K91.89     | Other postprocedural complications and disorders of digestive system                                                      | 2 - Surgical and peri-operative adverse events |
| K91.9      | Postprocedural disorder of digestive system, unspecified                                                                  | 2 - Surgical and peri-operative adverse events |
| <b>K94</b> | <b>Complications of artificial openings of the digestive system</b>                                                       | 2 - Surgical and peri-operative adverse events |
| K94.0      | Colostomy complications                                                                                                   | 2 - Surgical and peri-operative adverse events |
| K94.00     | Colostomy complication, unspecified                                                                                       | 2 - Surgical and peri-operative adverse events |
| K94.01     | Colostomy hemorrhage                                                                                                      | 2 - Surgical and peri-operative adverse events |
| K94.02     | Colostomy infection                                                                                                       | 2 - Surgical and peri-operative adverse events |



|            |                                                  |                                                |
|------------|--------------------------------------------------|------------------------------------------------|
| K94.03     | Colostomy malfunction                            | 2 - Surgical and peri-operative adverse events |
| K94.09     | Other complications of colostomy                 | 2 - Surgical and peri-operative adverse events |
| K94.1      | Enterostomy complications                        | 2 - Surgical and peri-operative adverse events |
| K94.10     | Enterostomy complication, unspecified            | 2 - Surgical and peri-operative adverse events |
| K94.11     | Enterostomy hemorrhage                           | 2 - Surgical and peri-operative adverse events |
| K94.12     | Enterostomy infection                            | 2 - Surgical and peri-operative adverse events |
| K94.13     | Enterostomy malfunction                          | 2 - Surgical and peri-operative adverse events |
| K94.19     | Other complications of enterostomy               | 2 - Surgical and peri-operative adverse events |
| K94.2      | Gastrostomy complications                        | 2 - Surgical and peri-operative adverse events |
| K94.20     | Gastrostomy complication, unspecified            | 2 - Surgical and peri-operative adverse events |
| K94.21     | Gastrostomy hemorrhage                           | 2 - Surgical and peri-operative adverse events |
| K94.22     | Gastrostomy infection                            | 2 - Surgical and peri-operative adverse events |
| K94.23     | Gastrostomy malfunction                          | 2 - Surgical and peri-operative adverse events |
| K94.29     | Other complications of gastrostomy               | 2 - Surgical and peri-operative adverse events |
| K94.3      | Esophagostomy complications                      | 2 - Surgical and peri-operative adverse events |
| K94.30     | Esophagostomy complications, unspecified         | 2 - Surgical and peri-operative adverse events |
| K94.31     | Esophagostomy hemorrhage                         | 2 - Surgical and peri-operative adverse events |
| K94.32     | Esophagostomy infection                          | 2 - Surgical and peri-operative adverse events |
| K94.33     | Esophagostomy malfunction                        | 2 - Surgical and peri-operative adverse events |
| K94.39     | Other complications of esophagostomy             | 2 - Surgical and peri-operative adverse events |
| <b>K95</b> | <b>Complications of bariatric procedures</b>     | 2 - Surgical and peri-operative adverse events |
| K95.0      | Complications of gastric band procedure          | 2 - Surgical and peri-operative adverse events |
| K95.01     | Infection due to gastric band procedure          | 2 - Surgical and peri-operative adverse events |
| K95.09     | Other complications of gastric band procedure    | 2 - Surgical and peri-operative adverse events |
| K95.8      | Complications of other bariatric procedure       | 2 - Surgical and peri-operative adverse events |
| K95.81     | Infection due to other bariatric procedure       | 2 - Surgical and peri-operative adverse events |
| K95.89     | Other complications of other bariatric procedure | 2 - Surgical and peri-operative adverse events |
| M87.1      | Osteonecrosis due to drugs                       | 1 - Adverse drug events                        |
| M87.10     | Osteonecrosis due to drugs, unspecified bone     | 1 - Adverse drug events                        |
| M87.11     | Osteonecrosis due to drugs, shoulder             | 1 - Adverse drug events                        |
| M87.111    | Osteonecrosis due to drugs, right shoulder       | 1 - Adverse drug events                        |
| M87.112    | Osteonecrosis due to drugs, left shoulder        | 1 - Adverse drug events                        |
| M87.119    | Osteonecrosis due to drugs, unspecified shoulder | 1 - Adverse drug events                        |
| M87.12     | Osteonecrosis due to drugs, humerus              | 1 - Adverse drug events                        |
| M87.121    | Osteonecrosis due to drugs, right humerus        | 1 - Adverse drug events                        |
| M87.122    | Osteonecrosis due to drugs, left humerus         | 1 - Adverse drug events                        |
| M87.129    | Osteonecrosis due to drugs, unspecified humerus  | 1 - Adverse drug events                        |

|            |                                                                                                                        |                                                |
|------------|------------------------------------------------------------------------------------------------------------------------|------------------------------------------------|
| M87.13     | Osteonecrosis due to drugs of radius, ulna and carpus                                                                  | 1 - Adverse drug events                        |
| M87.131    | Osteonecrosis due to drugs of right radius                                                                             | 1 - Adverse drug events                        |
| M87.132    | Osteonecrosis due to drugs of left radius                                                                              | 1 - Adverse drug events                        |
| M87.133    | Osteonecrosis due to drugs of unspecified radius                                                                       | 1 - Adverse drug events                        |
| M87.134    | Osteonecrosis due to drugs of right ulna                                                                               | 1 - Adverse drug events                        |
| M87.135    | Osteonecrosis due to drugs of left ulna                                                                                | 1 - Adverse drug events                        |
| M87.136    | Osteonecrosis due to drugs of unspecified ulna                                                                         | 1 - Adverse drug events                        |
| M87.137    | Osteonecrosis due to drugs of right carpus                                                                             | 1 - Adverse drug events                        |
| M87.138    | Osteonecrosis due to drugs of left carpus                                                                              | 1 - Adverse drug events                        |
| M87.139    | Osteonecrosis due to drugs of unspecified carpus                                                                       | 1 - Adverse drug events                        |
| M87.14     | Osteonecrosis due to drugs, hand and fingers                                                                           | 1 - Adverse drug events                        |
| M87.141    | Osteonecrosis due to drugs, right hand                                                                                 | 1 - Adverse drug events                        |
| M87.142    | Osteonecrosis due to drugs, left hand                                                                                  | 1 - Adverse drug events                        |
| M87.143    | Osteonecrosis due to drugs, unspecified hand                                                                           | 1 - Adverse drug events                        |
| M87.144    | Osteonecrosis due to drugs, right finger(s)                                                                            | 1 - Adverse drug events                        |
| M87.145    | Osteonecrosis due to drugs, left finger(s)                                                                             | 1 - Adverse drug events                        |
| M87.146    | Osteonecrosis due to drugs, unspecified finger(s)                                                                      | 1 - Adverse drug events                        |
| M87.15     | Osteonecrosis due to drugs, pelvis and femur                                                                           | 1 - Adverse drug events                        |
| M87.150    | Osteonecrosis due to drugs, pelvis                                                                                     | 1 - Adverse drug events                        |
| M87.151    | Osteonecrosis due to drugs, right femur                                                                                | 1 - Adverse drug events                        |
| M87.152    | Osteonecrosis due to drugs, left femur                                                                                 | 1 - Adverse drug events                        |
| M87.159    | Osteonecrosis due to drugs, unspecified femur                                                                          | 1 - Adverse drug events                        |
| M87.16     | Osteonecrosis due to drugs, tibia and fibula                                                                           | 1 - Adverse drug events                        |
| M87.161    | Osteonecrosis due to drugs, right tibia                                                                                | 1 - Adverse drug events                        |
| M87.162    | Osteonecrosis due to drugs, left tibia                                                                                 | 1 - Adverse drug events                        |
| M87.163    | Osteonecrosis due to drugs, unspecified tibia                                                                          | 1 - Adverse drug events                        |
| M87.164    | Osteonecrosis due to drugs, right fibula                                                                               | 1 - Adverse drug events                        |
| M87.165    | Osteonecrosis due to drugs, left fibula                                                                                | 1 - Adverse drug events                        |
| M87.166    | Osteonecrosis due to drugs, unspecified fibula                                                                         | 1 - Adverse drug events                        |
| M87.17     | Osteonecrosis due to drugs, ankle, foot and toes                                                                       | 1 - Adverse drug events                        |
| M87.171    | Osteonecrosis due to drugs, right ankle                                                                                | 1 - Adverse drug events                        |
| M87.172    | Osteonecrosis due to drugs, left ankle                                                                                 | 1 - Adverse drug events                        |
| M87.173    | Osteonecrosis due to drugs, unspecified ankle                                                                          | 1 - Adverse drug events                        |
| M87.174    | Osteonecrosis due to drugs, right foot                                                                                 | 1 - Adverse drug events                        |
| M87.175    | Osteonecrosis due to drugs, left foot                                                                                  | 1 - Adverse drug events                        |
| M87.176    | Osteonecrosis due to drugs, unspecified foot                                                                           | 1 - Adverse drug events                        |
| M87.177    | Osteonecrosis due to drugs, right toe(s)                                                                               | 1 - Adverse drug events                        |
| M87.178    | Osteonecrosis due to drugs, left toe(s)                                                                                | 1 - Adverse drug events                        |
| M87.179    | Osteonecrosis due to drugs, unspecified toe(s)                                                                         | 1 - Adverse drug events                        |
| M87.18     | Osteonecrosis due to drugs, other site                                                                                 | 1 - Adverse drug events                        |
| M87.180    | Osteonecrosis due to drugs, jaw                                                                                        | 1 - Adverse drug events                        |
| M87.188    | Osteonecrosis due to drugs, other site                                                                                 | 1 - Adverse drug events                        |
| M87.19     | Osteonecrosis due to drugs, multiple sites                                                                             | 1 - Adverse drug events                        |
| <b>N14</b> | <b>Drug- and heavy-metal-induced tubulo-interstitial and tubular conditions</b>                                        | 1 - Adverse drug events                        |
| N14.0      | Analgesic nephropathy                                                                                                  | 1 - Adverse drug events                        |
| N14.1      | Nephropathy induced by other drugs, medicaments and biological substances                                              | 1 - Adverse drug events                        |
| N14.2      | Nephropathy induced by unspecified drug, medicament or biological substance                                            | 1 - Adverse drug events                        |
| N14.3      | Nephropathy induced by heavy metals                                                                                    | 6 - Other                                      |
| N14.4      | Toxic nephropathy, not elsewhere classified                                                                            | 6 - Other                                      |
| <b>N65</b> | <b>Deformity and disproportion of reconstructed breast</b>                                                             | 2 - Surgical and peri-operative adverse events |
| N65.0      | Deformity of reconstructed breast                                                                                      | 2 - Surgical and peri-operative adverse events |
| N65.1      | Disproportion of reconstructed breast                                                                                  | 2 - Surgical and peri-operative adverse events |
| <b>N99</b> | <b>Intraoperative and postprocedural complications and disorders of genitourinary system, not elsewhere classified</b> | 2 - Surgical and peri-operative adverse events |
| N99.0      | Postprocedural (acute) (chronic) kidney failure                                                                        | 2 - Surgical and peri-operative adverse events |
| N99.1      | Postprocedural urethral stricture                                                                                      | 2 - Surgical and peri-operative adverse events |

|         |                                                                                                                                   |                                                |
|---------|-----------------------------------------------------------------------------------------------------------------------------------|------------------------------------------------|
| N99.11  | Postprocedural urethral stricture, male                                                                                           | 2 - Surgical and peri-operative adverse events |
| N99.110 | Postprocedural urethral stricture, male, meatal                                                                                   | 2 - Surgical and peri-operative adverse events |
| N99.111 | Postprocedural bulbous urethral stricture                                                                                         | 2 - Surgical and peri-operative adverse events |
| N99.112 | Postprocedural membranous urethral stricture                                                                                      | 2 - Surgical and peri-operative adverse events |
| N99.113 | Postprocedural anterior urethral stricture                                                                                        | 2 - Surgical and peri-operative adverse events |
| N99.114 | Postprocedural urethral stricture, male, unspecified                                                                              | 2 - Surgical and peri-operative adverse events |
| N99.12  | Postprocedural urethral stricture, female                                                                                         | 2 - Surgical and peri-operative adverse events |
| N99.2   | Postprocedural adhesions of vagina                                                                                                | 2 - Surgical and peri-operative adverse events |
| N99.3   | Prolapse of vaginal vault after hysterectomy                                                                                      | 2 - Surgical and peri-operative adverse events |
| N99.4   | Postprocedural pelvic peritoneal adhesions                                                                                        | 2 - Surgical and peri-operative adverse events |
| N99.5   | Complications of stoma of urinary tract                                                                                           | 2 - Surgical and peri-operative adverse events |
| N99.51  | Complication of cystostomy                                                                                                        | 2 - Surgical and peri-operative adverse events |
| N99.510 | Cystostomy hemorrhage                                                                                                             | 2 - Surgical and peri-operative adverse events |
| N99.511 | Cystostomy infection                                                                                                              | 2 - Surgical and peri-operative adverse events |
| N99.512 | Cystostomy malfunction                                                                                                            | 2 - Surgical and peri-operative adverse events |
| N99.518 | Other cystostomy complication                                                                                                     | 2 - Surgical and peri-operative adverse events |
| N99.52  | Complication of other external stoma of urinary tract                                                                             | 2 - Surgical and peri-operative adverse events |
| N99.520 | Hemorrhage of other external stoma of urinary tract                                                                               | 2 - Surgical and peri-operative adverse events |
| N99.521 | Infection of other external stoma of urinary tract                                                                                | 2 - Surgical and peri-operative adverse events |
| N99.522 | Malfunction of other external stoma of urinary tract                                                                              | 2 - Surgical and peri-operative adverse events |
| N99.528 | Other complication of other external stoma of urinary tract                                                                       | 2 - Surgical and peri-operative adverse events |
| N99.53  | Complication of other stoma of urinary tract                                                                                      | 2 - Surgical and peri-operative adverse events |
| N99.530 | Hemorrhage of other stoma of urinary tract                                                                                        | 2 - Surgical and peri-operative adverse events |
| N99.531 | Infection of other stoma of urinary tract                                                                                         | 2 - Surgical and peri-operative adverse events |
| N99.532 | Malfunction of other stoma of urinary tract                                                                                       | 2 - Surgical and peri-operative adverse events |
| N99.538 | Other complication of other stoma of urinary tract                                                                                | 2 - Surgical and peri-operative adverse events |
| N99.6   | Intraoperative hemorrhage and hematoma of a genitourinary system organ or structure complicating a procedure                      | 2 - Surgical and peri-operative adverse events |
| N99.61  | Intraoperative hemorrhage and hematoma of a genitourinary system organ or structure complicating a genitourinary system procedure | 2 - Surgical and peri-operative adverse events |
| N99.62  | Intraoperative hemorrhage and hematoma of a genitourinary system organ or structure complicating other procedure                  | 2 - Surgical and peri-operative adverse events |
| N99.7   | Accidental puncture and laceration of a genitourinary system organ or structure during a procedure                                | 3 - Misadventure                               |
| N99.71  | Accidental puncture and laceration of a genitourinary system organ or structure during a genitourinary system procedure           | 3 - Misadventure                               |
| N99.72  | Accidental puncture and laceration of a genitourinary system organ or structure during other procedure                            | 3 - Misadventure                               |
| N99.8   | Other intraoperative and postprocedural complications and disorders of genitourinary system                                       | 2 - Surgical and peri-operative adverse events |

|            |                                                                                                                                |                                                |
|------------|--------------------------------------------------------------------------------------------------------------------------------|------------------------------------------------|
| N99.81     | Other intraoperative complications of genitourinary system                                                                     | 2 - Surgical and peri-operative adverse events |
| N99.82     | Postprocedural hemorrhage and hematoma of a genitourinary system organ or structure following a procedure                      | 2 - Surgical and peri-operative adverse events |
| N99.820    | Postprocedural hemorrhage and hematoma of a genitourinary system organ or structure following a genitourinary system procedure | 2 - Surgical and peri-operative adverse events |
| N99.821    | Postprocedural hemorrhage and hematoma of a genitourinary system organ or structure following other procedure                  | 2 - Surgical and peri-operative adverse events |
| N99.83     | Residual ovary syndrome                                                                                                        | 2 - Surgical and peri-operative adverse events |
| N99.89     | Other postprocedural complications and disorders of genitourinary system                                                       | 2 - Surgical and peri-operative adverse events |
| N99.9      |                                                                                                                                | 2 - Surgical and peri-operative adverse events |
| P96.2      | Withdrawal symptoms from therapeutic use of drugs in newborn                                                                   | 1 - Adverse drug events                        |
| P96.5      | Complication to newborn due to (fetal) intrauterine procedure                                                                  | 2 - Surgical and peri-operative adverse events |
| R50.2      | Drug induced fever                                                                                                             | 1 - Adverse drug events                        |
| R50.82     | Postprocedural fever                                                                                                           | 2 - Surgical and peri-operative adverse events |
| R50.83     | Postvaccination fever                                                                                                          | 1 - Adverse drug events                        |
| <b>Y40</b> | <b>Systemic antibiotics</b>                                                                                                    | 1 - Adverse drug events                        |
| Y40.0      | Penicillins                                                                                                                    | 1 - Adverse drug events                        |
| Y40.1      | Cefalosporins and other beta-lactam antibiotics                                                                                | 1 - Adverse drug events                        |
| Y40.2      | Chloramphenicol group                                                                                                          | 1 - Adverse drug events                        |
| Y40.3      | Macrolides                                                                                                                     | 1 - Adverse drug events                        |
| Y40.4      | Tetracyclines                                                                                                                  | 1 - Adverse drug events                        |
| Y40.5      | Aminoglycosides                                                                                                                | 1 - Adverse drug events                        |
| Y40.6      | Rifamycins                                                                                                                     | 1 - Adverse drug events                        |
| Y40.7      | Antifungal antibiotics, systemically used                                                                                      | 1 - Adverse drug events                        |
| Y40.8      | Other systemic antibiotics                                                                                                     | 1 - Adverse drug events                        |
| Y40.9      | Systemic antibiotic, unspecified                                                                                               | 1 - Adverse drug events                        |
| <b>Y41</b> | <b>Other systemic anti-infectives and antiparasitics</b>                                                                       | 1 - Adverse drug events                        |
| Y41.0      | Sulfonamides                                                                                                                   | 1 - Adverse drug events                        |
| Y41.1      | Antimycobacterial drugs                                                                                                        | 1 - Adverse drug events                        |
| Y41.2      | Antimalarials and drugs acting on other blood protozoa                                                                         | 1 - Adverse drug events                        |
| Y41.3      | Other antiprotozoal drugs                                                                                                      | 1 - Adverse drug events                        |
| Y41.4      | Anthelmintics                                                                                                                  | 1 - Adverse drug events                        |
| Y41.5      | Antiviral drugs                                                                                                                | 1 - Adverse drug events                        |
| Y41.8      | Other specified systemic anti-infectives and antiparasitics                                                                    | 1 - Adverse drug events                        |
| Y41.9      | Systemic anti-infective and antiparasitic, unspecified                                                                         | 1 - Adverse drug events                        |
| <b>Y42</b> | <b>Hormones and their synthetic substitutes and antagonists, not elsewhere classified</b>                                      | 1 - Adverse drug events                        |
| Y42.0      | Glucocorticoids and synthetic analogues                                                                                        | 1 - Adverse drug events                        |
| Y42.1      | Thyroid hormones and substitutes                                                                                               | 1 - Adverse drug events                        |
| Y42.2      | Antithyroid drugs                                                                                                              | 1 - Adverse drug events                        |
| Y42.3      | Insulin and oral hypoglycaemic [antidiabetic] drugs                                                                            | 1 - Adverse drug events                        |
| Y42.4      | Oral contraceptives                                                                                                            | 1 - Adverse drug events                        |
| Y42.5      | Other estrogens and progestogens                                                                                               | 1 - Adverse drug events                        |
| Y42.6      | Antigonadotrophins, antiestrogens, antiandrogens, not elsewhere classified                                                     | 1 - Adverse drug events                        |
| Y42.7      | Androgens and anabolic congeners                                                                                               | 1 - Adverse drug events                        |
| Y42.8      | Other and unspecified hormones and their synthetic substitutes                                                                 | 1 - Adverse drug events                        |
| Y42.9      | Other and unspecified hormone antagonists                                                                                      | 1 - Adverse drug events                        |
| <b>Y43</b> | <b>Primarily systemic agents</b>                                                                                               | 1 - Adverse drug events                        |
| Y43.0      | Antiallergic and antiemetic drugs                                                                                              | 1 - Adverse drug events                        |
| Y43.1      | Antineoplastic antimetabolites                                                                                                 | 1 - Adverse drug events                        |
| Y43.2      | Antineoplastic natural products                                                                                                | 1 - Adverse drug events                        |
| Y43.3      | Other antineoplastic drugs                                                                                                     | 1 - Adverse drug events                        |
| Y43.4      | Immunosuppressive agents                                                                                                       | 1 - Adverse drug events                        |
| Y43.5      | Acidifying and alkalizing agents                                                                                               | 1 - Adverse drug events                        |
| Y43.6      | Enzymes, not elsewhere classified                                                                                              | 1 - Adverse drug events                        |
| Y43.8      | Other primarily systemic agents, not elsewhere classified                                                                      | 1 - Adverse drug events                        |
| Y43.9      | Primarily systemic agent, unspecified                                                                                          | 1 - Adverse drug events                        |

|            |                                                                             |                         |
|------------|-----------------------------------------------------------------------------|-------------------------|
| <b>Y44</b> | <b>Agents primarily affecting blood constituents</b>                        | 1 - Adverse drug events |
| Y44.0      | Iron preparations and other anti-hypochromic-anaemia preparations           | 1 - Adverse drug events |
| Y44.1      | Vitamin B 12 , folic acid and other anti-megaloblastic-anaemia preparations | 1 - Adverse drug events |
| Y44.2      | Anticoagulants                                                              | 1 - Adverse drug events |
| Y44.3      | Anticoagulant antagonists, vitamin K and other coagulants                   | 1 - Adverse drug events |
| Y44.4      | Antithrombotic drugs [platelet-aggregation inhibitors]                      | 1 - Adverse drug events |
| Y44.5      | Thrombolytic drugs                                                          | 1 - Adverse drug events |
| Y44.6      | Natural blood and blood products                                            | 1 - Adverse drug events |
| Y44.7      | Plasma substitutes                                                          | 1 - Adverse drug events |
| Y44.9      | Other and unspecified agents affecting blood constituents                   | 1 - Adverse drug events |
| <b>Y45</b> | <b>Analgesics, antipyretics and anti-inflammatory drugs</b>                 | 1 - Adverse drug events |
| Y45.0      | Opioids and related analgesics                                              | 1 - Adverse drug events |
| Y45.1      | Salicylates                                                                 | 1 - Adverse drug events |
| Y45.2      | Propionic acid derivatives                                                  | 1 - Adverse drug events |
| Y45.3      | Other nonsteroidal anti-inflammatory drugs [NSAID]                          | 1 - Adverse drug events |
| Y45.4      | Antirheumatics                                                              | 1 - Adverse drug events |
| Y45.5      | 4-Aminophenol derivatives                                                   | 1 - Adverse drug events |
| Y45.8      | Other analgesics and antipyretics                                           | 1 - Adverse drug events |
| Y45.9      | Analgesic, antipyretic and anti-inflammatory drug, unspecified              | 1 - Adverse drug events |
| <b>Y46</b> | <b>Antiepileptics and antiparkinsonism drugs</b>                            | 1 - Adverse drug events |
| Y46.0      | Succinimides                                                                | 1 - Adverse drug events |
| Y46.1      | Oxazolindiones                                                              | 1 - Adverse drug events |
| Y46.2      | Hydantoin derivatives                                                       | 1 - Adverse drug events |
| Y46.3      | Deoxybarbiturates                                                           | 1 - Adverse drug events |
| Y46.4      | Iminostilbenes                                                              | 1 - Adverse drug events |
| Y46.5      | Valproic acid                                                               | 1 - Adverse drug events |
| Y46.6      | Other and unspecified antiepileptics                                        | 1 - Adverse drug events |
| Y46.7      | Antiparkinsonism drugs                                                      | 1 - Adverse drug events |
| Y46.8      | Antispasticity drugs                                                        | 1 - Adverse drug events |
| <b>Y47</b> | <b>Sedatives, hypnotics and antianxiety drugs</b>                           | 1 - Adverse drug events |
| Y47.0      | Barbiturates, not elsewhere classified                                      | 1 - Adverse drug events |
| Y47.1      | Benzodiazepines                                                             | 1 - Adverse drug events |
| Y47.2      | Cloral derivatives                                                          | 1 - Adverse drug events |
| Y47.3      | Paraldehyde                                                                 | 1 - Adverse drug events |
| Y47.4      | Bromine compounds                                                           | 1 - Adverse drug events |
| Y47.5      | Mixed sedatives and hypnotics, not elsewhere classified                     | 1 - Adverse drug events |
| Y47.8      | Other sedatives, hypnotics and antianxiety drugs                            | 1 - Adverse drug events |
| Y47.9      | Sedative, hypnotic and antianxiety drug, unspecified                        | 1 - Adverse drug events |
| <b>Y48</b> | <b>Anaesthetics and therapeutic gases</b>                                   | 1 - Adverse drug events |
| Y48.0      | Inhaled anaesthetics                                                        | 1 - Adverse drug events |
| Y48.1      | Parenteral anaesthetics                                                     | 1 - Adverse drug events |
| Y48.2      | Other and unspecified general anaesthetics                                  | 1 - Adverse drug events |
| Y48.3      | Local anaesthetics                                                          | 1 - Adverse drug events |
| Y48.4      | Anaesthetic, unspecified                                                    | 1 - Adverse drug events |
| Y48.5      | Therapeutic gases                                                           | 1 - Adverse drug events |
| <b>Y49</b> | <b>Psychotropic drugs, not elsewhere classified</b>                         | 1 - Adverse drug events |
| Y49.0      | Tricyclic and tetracyclic antidepressants                                   | 1 - Adverse drug events |
| Y49.1      | Monoamine-oxidase-inhibitor antidepressants                                 | 1 - Adverse drug events |
| Y49.2      | Other and unspecified antidepressants                                       | 1 - Adverse drug events |
| Y49.3      | Phenothiazine antipsychotics and neuroleptics                               | 1 - Adverse drug events |
| Y49.4      | Butyrophenone and thioxanthene neuroleptics                                 | 1 - Adverse drug events |
| Y49.5      | Other antipsychotics and neuroleptics                                       | 1 - Adverse drug events |
| Y49.6      | Psychodysleptics [hallucinogens]                                            | 1 - Adverse drug events |
| Y49.7      | Psychostimulants with abuse potential                                       | 1 - Adverse drug events |
| Y49.8      | Other psychotropic drugs, not elsewhere classified                          | 1 - Adverse drug events |
| Y49.9      | Psychotropic drug, unspecified                                              | 1 - Adverse drug events |
| <b>Y50</b> | <b>Central nervous system stimulants, not elsewhere classified</b>          | 1 - Adverse drug events |
| Y50.0      | Analeptics                                                                  | 1 - Adverse drug events |
| Y50.1      | Opioid receptor antagonists                                                 | 1 - Adverse drug events |
| Y50.2      | Methylxanthines, not elsewhere classified                                   | 1 - Adverse drug events |
| Y50.8      | Other central nervous system stimulants                                     | 1 - Adverse drug events |

|            |                                                                                                                                  |                         |
|------------|----------------------------------------------------------------------------------------------------------------------------------|-------------------------|
| Y50.9      | Central nervous system stimulant, unspecified                                                                                    | 1 - Adverse drug events |
| <b>Y51</b> | <b>Drugs primarily affecting the autonomic nervous system</b>                                                                    | 1 - Adverse drug events |
| Y51.0      | Anticholinesterase agents                                                                                                        | 1 - Adverse drug events |
| Y51.1      | Other parasympathomimetics [cholinergics]                                                                                        | 1 - Adverse drug events |
| Y51.2      | Ganglionic blocking drugs, not elsewhere classified                                                                              | 1 - Adverse drug events |
| Y51.3      | Other parasympatholytics [anticholinergics and antimuscarinics] and spasmolytics, not elsewhere classified                       | 1 - Adverse drug events |
| Y51.4      | Predominantly alpha-adrenoreceptor agonists, not elsewhere classified                                                            | 1 - Adverse drug events |
| Y51.5      | Predominantly beta-adrenoreceptor agonists, not elsewhere classified                                                             | 1 - Adverse drug events |
| Y51.6      | Alpha-adrenoreceptor antagonists, not elsewhere classified                                                                       | 1 - Adverse drug events |
| Y51.7      | Beta-adrenoreceptor antagonists, not elsewhere classified                                                                        | 1 - Adverse drug events |
| Y51.8      | Centrally acting and adrenergic-neuron-blocking agents, not elsewhere classified                                                 | 1 - Adverse drug events |
| Y51.9      | Other and unspecified drugs primarily affecting the autonomic nervous system                                                     | 1 - Adverse drug events |
| <b>Y52</b> | <b>Agents primarily affecting the cardiovascular system</b>                                                                      | 1 - Adverse drug events |
| Y52.0      | Cardiac-stimulant glycosides and drugs of similar action                                                                         | 1 - Adverse drug events |
| Y52.1      | Calcium-channel blockers                                                                                                         | 1 - Adverse drug events |
| Y52.2      | Other antidysrhythmic drugs, not elsewhere classified                                                                            | 1 - Adverse drug events |
| Y52.3      | Coronary vasodilators, not elsewhere classified                                                                                  | 1 - Adverse drug events |
| Y52.4      | Angiotensin-converting-enzyme inhibitors                                                                                         | 1 - Adverse drug events |
| Y52.5      | Other antihypertensive drugs, not elsewhere classified                                                                           | 1 - Adverse drug events |
| Y52.6      | Antihyperlipidaemic and antiarteriosclerotic drugs                                                                               | 1 - Adverse drug events |
| Y52.7      | Peripheral vasodilators                                                                                                          | 1 - Adverse drug events |
| Y52.8      | Antivaricose drugs, including sclerosing agents                                                                                  | 1 - Adverse drug events |
| Y52.9      | Other and unspecified agents primarily affecting the cardiovascular system                                                       | 1 - Adverse drug events |
| <b>Y53</b> | <b>Agents primarily affecting the gastrointestinal system</b>                                                                    | 1 - Adverse drug events |
| Y53.0      | Histamine H <sub>2</sub> -receptor antagonists                                                                                   | 1 - Adverse drug events |
| Y53.1      | Other antacids and anti-gastric-secretion drugs                                                                                  | 1 - Adverse drug events |
| Y53.2      | Stimulant laxatives                                                                                                              | 1 - Adverse drug events |
| Y53.3      | Saline and osmotic laxatives                                                                                                     | 1 - Adverse drug events |
| Y53.4      | Other laxatives                                                                                                                  | 1 - Adverse drug events |
| Y53.5      | Digestants                                                                                                                       | 1 - Adverse drug events |
| Y53.6      | Antidiarrhoeal drugs                                                                                                             | 1 - Adverse drug events |
| Y53.7      | Emetics                                                                                                                          | 1 - Adverse drug events |
| Y53.8      | Other agents primarily affecting the gastrointestinal system                                                                     | 1 - Adverse drug events |
| Y53.9      | Agent primarily affecting the gastrointestinal system, unspecified                                                               | 1 - Adverse drug events |
| <b>Y54</b> | <b>Agents primarily affecting water-balance and mineral and uric acid metabolism</b>                                             | 1 - Adverse drug events |
| Y54.0      | Mineralocorticoids                                                                                                               | 1 - Adverse drug events |
| Y54.1      | Mineralocorticoid antagonists [aldosterone antagonists]                                                                          | 1 - Adverse drug events |
| Y54.2      | Carbonic-anhydrase inhibitors                                                                                                    | 1 - Adverse drug events |
| Y54.3      | Benzothiadiazine derivatives                                                                                                     | 1 - Adverse drug events |
| Y54.4      | Loop [high-ceiling] diuretics                                                                                                    | 1 - Adverse drug events |
| Y54.5      | Other diuretics                                                                                                                  | 1 - Adverse drug events |
| Y54.6      | Electrolytic, caloric and water-balance agents                                                                                   | 1 - Adverse drug events |
| Y54.7      | Agents affecting calcification                                                                                                   | 1 - Adverse drug events |
| Y54.8      | Agents affecting uric acid metabolism                                                                                            | 1 - Adverse drug events |
| Y54.9      | Mineral salts, not elsewhere classified                                                                                          | 1 - Adverse drug events |
| <b>Y55</b> | <b>Agents primarily acting on smooth and skeletal muscles and the respiratory system</b>                                         | 1 - Adverse drug events |
| Y55.0      | Oxytocic drugs                                                                                                                   | 1 - Adverse drug events |
| Y55.1      | Skeletal muscle relaxants [neuromuscular blocking agents]                                                                        | 1 - Adverse drug events |
| Y55.2      | Other and unspecified agents primarily acting on muscles                                                                         | 1 - Adverse drug events |
| Y55.3      | Antitussives                                                                                                                     | 1 - Adverse drug events |
| Y55.4      | Expectorants                                                                                                                     | 1 - Adverse drug events |
| Y55.5      | Anti-common-cold drugs                                                                                                           | 1 - Adverse drug events |
| Y55.6      | Antiasthmatics, not elsewhere classified                                                                                         | 1 - Adverse drug events |
| Y55.7      | Other and unspecified agents primarily acting on the respiratory system                                                          | 1 - Adverse drug events |
| <b>Y56</b> | <b>Topical agents primarily affecting skin and mucous membrane and ophthalmological, otorhinolaryngological and dental drugs</b> | 1 - Adverse drug events |
| Y56.0      | Local antifungal, anti-infective and anti-inflammatory drugs, not elsewhere classified                                           | 1 - Adverse drug events |
| Y56.1      | Antipruritics                                                                                                                    | 1 - Adverse drug events |
| Y56.2      | Local astringents and local detergents                                                                                           | 1 - Adverse drug events |
| Y56.3      | Emollients, demulcents and protectants                                                                                           | 1 - Adverse drug events |

|            |                                                                                                 |                         |
|------------|-------------------------------------------------------------------------------------------------|-------------------------|
| Y56.4      | Keratolytics, keratoplastics and other hair treatment drugs and preparations                    | 1 - Adverse drug events |
| Y56.5      | Ophthalmological drugs and preparations                                                         | 1 - Adverse drug events |
| Y56.6      | Otorhinolaryngological drugs and preparations                                                   | 1 - Adverse drug events |
| Y56.7      | Dental drugs, topically applied                                                                 | 1 - Adverse drug events |
| Y56.8      | Other topical agents                                                                            | 1 - Adverse drug events |
| Y56.9      | Topical agent, unspecified                                                                      | 1 - Adverse drug events |
| <b>Y57</b> | <b>Other and unspecified drugs and medicaments</b>                                              | 1 - Adverse drug events |
| Y57.0      | Appetite depressants [anorectics]                                                               | 1 - Adverse drug events |
| Y57.1      | Lipotropic drugs                                                                                | 1 - Adverse drug events |
| Y57.2      | Antidotes and chelating agents, not elsewhere classified                                        | 1 - Adverse drug events |
| Y57.3      | Alcohol deterrents                                                                              | 1 - Adverse drug events |
| Y57.4      | Pharmaceutical excipients                                                                       | 1 - Adverse drug events |
| Y57.5      | X-ray contrast media                                                                            | 1 - Adverse drug events |
| Y57.6      | Other diagnostic agents                                                                         | 1 - Adverse drug events |
| Y57.7      | Vitamins, not elsewhere classified                                                              | 1 - Adverse drug events |
| Y57.8      | Other drugs and medicaments                                                                     | 1 - Adverse drug events |
| Y57.9      | Drug or medicament, unspecified                                                                 | 1 - Adverse drug events |
| <b>Y58</b> | <b>Bacterial vaccines</b>                                                                       | 1 - Adverse drug events |
| Y58.0      | BCG vaccine                                                                                     | 1 - Adverse drug events |
| Y58.1      | Typhoid and paratyphoid vaccine                                                                 | 1 - Adverse drug events |
| Y58.2      | Cholera vaccine                                                                                 | 1 - Adverse drug events |
| Y58.3      | Plague vaccine                                                                                  | 1 - Adverse drug events |
| Y58.4      | Tetanus vaccine                                                                                 | 1 - Adverse drug events |
| Y58.5      | Diphtheria vaccine                                                                              | 1 - Adverse drug events |
| Y58.6      | Pertussis vaccine, including combinations with a pertussis component                            | 1 - Adverse drug events |
| Y58.8      | Mixed bacterial vaccines, except combinations with a pertussis component                        | 1 - Adverse drug events |
| Y58.9      | Other and unspecified bacterial vaccines                                                        | 1 - Adverse drug events |
| <b>Y59</b> | <b>Other and unspecified vaccines and biological substances</b>                                 | 1 - Adverse drug events |
| Y59.0      | Viral vaccines                                                                                  | 1 - Adverse drug events |
| Y59.1      | Rickettsial vaccines                                                                            | 1 - Adverse drug events |
| Y59.2      | Protozoal vaccines                                                                              | 1 - Adverse drug events |
| Y59.3      | Immunoglobulin                                                                                  | 1 - Adverse drug events |
| Y59.8      | Other specified vaccines and biological substances                                              | 1 - Adverse drug events |
| Y59.9      | Vaccine or biological substance, unspecified                                                    | 1 - Adverse drug events |
| <b>Y60</b> | <b>Unintentional cut, puncture, perforation or haemorrhage during surgical and medical care</b> | 3 - Misadventure        |
| Y60.0      | During surgical operation                                                                       | 3 - Misadventure        |
| Y60.1      | During infusion or transfusion                                                                  | 3 - Misadventure        |
| Y60.2      | During kidney dialysis or other perfusion                                                       | 3 - Misadventure        |
| Y60.3      | During injection or immunization                                                                | 3 - Misadventure        |
| Y60.4      | During endoscopic examination                                                                   | 3 - Misadventure        |
| Y60.5      | During heart catheterization                                                                    | 3 - Misadventure        |
| Y60.6      | During aspiration, puncture and other catheterization                                           | 3 - Misadventure        |
| Y60.7      | During administration of enema                                                                  | 3 - Misadventure        |
| Y60.8      | During other surgical and medical care                                                          | 3 - Misadventure        |
| Y60.9      | During unspecified surgical and medical care                                                    | 3 - Misadventure        |
| <b>Y61</b> | <b>Foreign object accidentally left in body during surgical and medical care</b>                | 3 - Misadventure        |
| Y61.0      | During surgical operation                                                                       | 3 - Misadventure        |
| Y61.1      | During infusion or transfusion                                                                  | 3 - Misadventure        |
| Y61.2      | During kidney dialysis or other perfusion                                                       | 3 - Misadventure        |
| Y61.3      | During injection or immunization                                                                | 3 - Misadventure        |
| Y61.4      | During endoscopic examination                                                                   | 3 - Misadventure        |
| Y61.5      | During heart catheterization                                                                    | 3 - Misadventure        |
| Y61.6      | During aspiration, puncture and other catheterization                                           | 3 - Misadventure        |
| Y61.7      | During removal of catheter or packing                                                           | 3 - Misadventure        |
| Y61.8      | During other surgical and medical care                                                          | 3 - Misadventure        |
| Y61.9      | During unspecified surgical and medical care                                                    | 3 - Misadventure        |
| <b>Y62</b> | <b>Failure of sterile precautions during surgical and medical care</b>                          | 3 - Misadventure        |
| Y62.0      | Failure of sterile precautions during surgical operation                                        | 3 - Misadventure        |
| Y62.1      | Failure of sterile precautions during infusion or transfusion                                   | 3 - Misadventure        |
| Y62.2      | Failure of sterile precautions during kidney dialysis and other perfusion                       | 3 - Misadventure        |
| Y62.3      | Failure of sterile precautions during injection or immunization                                 | 3 - Misadventure        |

|            |                                                                                                                  |                                 |
|------------|------------------------------------------------------------------------------------------------------------------|---------------------------------|
| Y62.4      | Failure of sterile precautions during endoscopic examination                                                     | 3 - Misadventure                |
| Y62.5      | Failure of sterile precautions during heart catheterization                                                      | 3 - Misadventure                |
| Y62.6      | Failure of sterile precautions during aspiration, puncture and other catheterization                             | 3 - Misadventure                |
| Y62.8      | Failure of sterile precautions during other surgical and medical care                                            | 3 - Misadventure                |
| Y62.9      | Failure of sterile precautions during unspecified surgical and medical care                                      | 3 - Misadventure                |
| <b>Y63</b> | <b>Failure in dosage during surgical and medical care</b>                                                        | 3 - Misadventure                |
| Y63.0      | Excessive amount of blood or other fluid given during transfusion or infusion                                    | 3 - Misadventure                |
| Y63.1      | Incorrect dilution of fluid used during infusion                                                                 | 3 - Misadventure                |
| Y63.2      | Overdose of radiation given during therapy                                                                       | 3 - Misadventure                |
| Y63.3      | Inadvertent exposure of patient to radiation during medical care                                                 | 3 - Misadventure                |
| Y63.4      | Failure in dosage in electroshock or insulin-shock therapy                                                       | 3 - Misadventure                |
| Y63.5      | Inappropriate temperature in local application and packing                                                       | 3 - Misadventure                |
| Y63.6      | Underdosing and nonadministration of necessary drug, medicament or biological substance                          | 3 - Misadventure                |
| Y63.8      | Failure in dosage during other surgical and medical care                                                         | 3 - Misadventure                |
| Y63.9      | Failure in dosage during unspecified surgical and medical care                                                   | 3 - Misadventure                |
| <b>Y64</b> | <b>Contaminated medical or biological substances</b>                                                             | 3 - Misadventure                |
| Y64.0      | Contaminated medical or biological substance, transfused or infused                                              | 3 - Misadventure                |
| Y64.1      | Contaminated medical or biological substance, injected or used for immunization                                  | 3 - Misadventure                |
| Y64.8      | Contaminated medical or biological substance administered by other means                                         | 3 - Misadventure                |
| Y64.9      | Contaminated medical or biological substance administered by unspecified means                                   | 3 - Misadventure                |
| <b>Y65</b> | <b>Other misadventures during surgical and medical care</b>                                                      | 3 - Misadventure                |
| Y65.0      | Mismatched blood in transfusion                                                                                  | 3 - Misadventure                |
| Y65.1      | Wrong fluid used in infusion                                                                                     | 3 - Misadventure                |
| Y65.2      | Failure in suture or ligature during surgical operation                                                          | 3 - Misadventure                |
| Y65.3      | Endotracheal tube wrongly placed during anesthetic procedure                                                     | 3 - Misadventure                |
| Y65.4      | Failure to introduce or to remove other tube or instrument                                                       | 3 - Misadventure                |
| Y65.5      | Performance of wrong procedure (operation)                                                                       | 3 - Misadventure                |
| Y65.51     | Performance of wrong procedure (operation) on correct patient                                                    | 3 - Misadventure                |
| Y65.52     | Performance of procedure (operation) on patient not scheduled for surgery                                        | 3 - Misadventure                |
| Y65.53     | Performance of correct procedure (operation) on wrong side or body part                                          | 3 - Misadventure                |
| Y65.8      | Other specified misadventures during surgical and medical care                                                   | 3 - Misadventure                |
| <b>Y66</b> | <b>Nonadministration of surgical and medical care</b>                                                            | 3 - Misadventure                |
| <b>Y69</b> | <b>Unspecified misadventure during surgical and medical care</b>                                                 | 3 - Misadventure                |
| Y69.2      |                                                                                                                  | 3 - Misadventure                |
| Y69.9      |                                                                                                                  | 3 - Misadventure                |
| <b>Y70</b> | <b>Anesthesiology devices associated with adverse incidents</b>                                                  | 5 - Medical or surgical devices |
| Y70.0      | Diagnostic and monitoring anesthesiology devices associated with adverse incidents                               | 5 - Medical or surgical devices |
| Y70.1      | Therapeutic (nonsurgical) and rehabilitative anesthesiology devices associated with adverse incidents            | 5 - Medical or surgical devices |
| Y70.2      | Prosthetic and other implants, materials and accessory anesthesiology devices associated with adverse incidents  | 5 - Medical or surgical devices |
| Y70.3      | Surgical instruments, materials and anesthesiology devices (including sutures) associated with adverse incidents | 5 - Medical or surgical devices |
| Y70.8      | Miscellaneous anesthesiology devices associated with adverse incidents, not elsewhere classified                 | 5 - Medical or surgical devices |
| <b>Y71</b> | <b>Cardiovascular devices associated with adverse incidents</b>                                                  | 5 - Medical or surgical devices |
| Y71.0      | Diagnostic and monitoring cardiovascular devices associated with adverse incidents                               | 5 - Medical or surgical devices |
| Y71.1      | Therapeutic (nonsurgical) and rehabilitative cardiovascular devices associated with adverse incidents            | 5 - Medical or surgical devices |
| Y71.2      | Prosthetic and other implants, materials and accessory cardiovascular devices associated with adverse incidents  | 5 - Medical or surgical devices |
| Y71.3      | Surgical instruments, materials and cardiovascular devices (including sutures) associated with adverse incidents | 5 - Medical or surgical devices |
| Y71.8      | Miscellaneous cardiovascular devices associated with adverse incidents, not elsewhere classified                 | 5 - Medical or surgical devices |
| <b>Y72</b> | <b>Otorhinolaryngological devices associated with adverse incidents</b>                                          | 5 - Medical or surgical devices |



|            |                                                                                                                                     |                                 |
|------------|-------------------------------------------------------------------------------------------------------------------------------------|---------------------------------|
| Y72.0      | Diagnostic and monitoring otorhinolaryngological devices associated with adverse incidents                                          | 5 - Medical or surgical devices |
| Y72.1      | Therapeutic (nonsurgical) and rehabilitative otorhinolaryngological devices associated with adverse incidents                       | 5 - Medical or surgical devices |
| Y72.2      | Prosthetic and other implants, materials and accessory otorhinolaryngological devices associated with adverse incidents             | 5 - Medical or surgical devices |
| Y72.3      | Surgical instruments, materials and otorhinolaryngological devices (including sutures) associated with adverse incidents            | 5 - Medical or surgical devices |
| Y72.8      | Miscellaneous otorhinolaryngological devices associated with adverse incidents, not elsewhere classified                            | 5 - Medical or surgical devices |
| <b>Y73</b> | <b>Gastroenterology and urology devices associated with adverse incidents</b>                                                       | 5 - Medical or surgical devices |
| Y73.0      | Diagnostic and monitoring gastroenterology and urology devices associated with adverse incidents                                    | 5 - Medical or surgical devices |
| Y73.1      | Therapeutic (nonsurgical) and rehabilitative gastroenterology and urology devices associated with adverse incidents                 | 5 - Medical or surgical devices |
| Y73.2      | Prosthetic and other implants, materials and accessory gastroenterology and urology devices associated with adverse incidents       | 5 - Medical or surgical devices |
| Y73.3      | Surgical instruments, materials and gastroenterology and urology devices (including sutures) associated with adverse incidents      | 5 - Medical or surgical devices |
| Y73.8      | Miscellaneous gastroenterology and urology devices associated with adverse incidents, not elsewhere classified                      | 5 - Medical or surgical devices |
| <b>Y74</b> | <b>General hospital and personal-use devices associated with adverse incidents</b>                                                  | 5 - Medical or surgical devices |
| Y74.0      | Diagnostic and monitoring general hospital and personal-use devices associated with adverse incidents                               | 5 - Medical or surgical devices |
| Y74.1      | Therapeutic (nonsurgical) and rehabilitative general hospital and personal-use devices associated with adverse incidents            | 5 - Medical or surgical devices |
| Y74.2      | Prosthetic and other implants, materials and accessory general hospital and personal-use devices associated with adverse incidents  | 5 - Medical or surgical devices |
| Y74.3      | Surgical instruments, materials and general hospital and personal-use devices (including sutures) associated with adverse incidents | 5 - Medical or surgical devices |
| Y74.8      | Miscellaneous general hospital and personal-use devices associated with adverse incidents, not elsewhere classified                 | 5 - Medical or surgical devices |
| <b>Y75</b> | <b>Neurological devices associated with adverse incidents</b>                                                                       | 5 - Medical or surgical devices |
| Y75.0      | Diagnostic and monitoring neurological devices associated with adverse incidents                                                    | 5 - Medical or surgical devices |
| Y75.1      | Therapeutic (nonsurgical) and rehabilitative neurological devices associated with adverse incidents                                 | 5 - Medical or surgical devices |
| Y75.2      | Prosthetic and other implants, materials and neurological devices associated with adverse incidents                                 | 5 - Medical or surgical devices |
| Y75.3      | Surgical instruments, materials and neurological devices (including sutures) associated with adverse incidents                      | 5 - Medical or surgical devices |
| Y75.8      | Miscellaneous neurological devices associated with adverse incidents, not elsewhere classified                                      | 5 - Medical or surgical devices |
| <b>Y76</b> | <b>Obstetric and gynecological devices associated with adverse incidents</b>                                                        | 5 - Medical or surgical devices |
| Y76.0      | Diagnostic and monitoring obstetric and gynecological devices associated with adverse incidents                                     | 5 - Medical or surgical devices |
| Y76.1      | Therapeutic (nonsurgical) and rehabilitative obstetric and gynecological devices associated with adverse incidents                  | 5 - Medical or surgical devices |
| Y76.2      | Prosthetic and other implants, materials and accessory obstetric and gynecological devices associated with adverse incidents        | 5 - Medical or surgical devices |
| Y76.3      | Surgical instruments, materials and obstetric and gynecological devices (including sutures) associated with adverse incidents       | 5 - Medical or surgical devices |
| Y76.8      | Miscellaneous obstetric and gynecological devices associated with adverse incidents, not elsewhere classified                       | 5 - Medical or surgical devices |
| Y76.9      | Obstetric and gynaecological devices associated with adverse incidents                                                              | 5 - Medical or surgical devices |
| <b>Y77</b> | <b>Ophthalmic devices associated with adverse incidents</b>                                                                         | 5 - Medical or surgical devices |
| Y77.0      | Diagnostic and monitoring ophthalmic devices associated with adverse incidents                                                      | 5 - Medical or surgical devices |

|            |                                                                                                                                |                                 |
|------------|--------------------------------------------------------------------------------------------------------------------------------|---------------------------------|
| Y77.1      | Therapeutic (nonsurgical) and rehabilitative ophthalmic devices associated with adverse incidents                              | 5 - Medical or surgical devices |
| Y77.2      | Prosthetic and other implants, materials and accessory ophthalmic devices associated with adverse incidents                    | 5 - Medical or surgical devices |
| Y77.3      | Surgical instruments, materials and ophthalmic devices (including sutures) associated with adverse incidents                   | 5 - Medical or surgical devices |
| Y77.8      | Miscellaneous ophthalmic devices associated with adverse incidents, not elsewhere classified                                   | 5 - Medical or surgical devices |
| <b>Y78</b> | <b>Radiological devices associated with adverse incidents</b>                                                                  | 5 - Medical or surgical devices |
| Y78.0      | Diagnostic and monitoring radiological devices associated with adverse incidents                                               | 5 - Medical or surgical devices |
| Y78.1      | Therapeutic (nonsurgical) and rehabilitative radiological devices associated with adverse incidents                            | 5 - Medical or surgical devices |
| Y78.2      | Prosthetic and other implants, materials and accessory radiological devices associated with adverse incidents                  | 5 - Medical or surgical devices |
| Y78.3      | Surgical instruments, materials and radiological devices (including sutures) associated with adverse incidents                 | 5 - Medical or surgical devices |
| Y78.8      | Miscellaneous radiological devices associated with adverse incidents, not elsewhere classified                                 | 5 - Medical or surgical devices |
| <b>Y79</b> | <b>Orthopedic devices associated with adverse incidents</b>                                                                    | 5 - Medical or surgical devices |
| Y79.0      | Diagnostic and monitoring orthopedic devices associated with adverse incidents                                                 | 5 - Medical or surgical devices |
| Y79.1      | Therapeutic (nonsurgical) and rehabilitative orthopedic devices associated with adverse incidents                              | 5 - Medical or surgical devices |
| Y79.2      | Prosthetic and other implants, materials and accessory orthopedic devices associated with adverse incidents                    | 5 - Medical or surgical devices |
| Y79.3      | Surgical instruments, materials and orthopedic devices (including sutures) associated with adverse incidents                   | 5 - Medical or surgical devices |
| Y79.8      | Miscellaneous orthopedic devices associated with adverse incidents, not elsewhere classified                                   | 5 - Medical or surgical devices |
| <b>Y80</b> | <b>Physical medicine devices associated with adverse incidents</b>                                                             | 5 - Medical or surgical devices |
| Y80.0      | Diagnostic and monitoring physical medicine devices associated with adverse incidents                                          | 5 - Medical or surgical devices |
| Y80.1      | Therapeutic (nonsurgical) and rehabilitative physical medicine devices associated with adverse incidents                       | 5 - Medical or surgical devices |
| Y80.2      | Prosthetic and other implants, materials and accessory physical medicine devices associated with adverse incidents             | 5 - Medical or surgical devices |
| Y80.3      | Surgical instruments, materials and physical medicine devices (including sutures) associated with adverse incidents            | 5 - Medical or surgical devices |
| Y80.8      | Miscellaneous physical medicine devices associated with adverse incidents, not elsewhere classified                            | 5 - Medical or surgical devices |
| <b>Y81</b> | <b>General- and plastic-surgery devices associated with adverse incidents</b>                                                  | 5 - Medical or surgical devices |
| Y81.0      | Diagnostic and monitoring general- and plastic-surgery devices associated with adverse incidents                               | 5 - Medical or surgical devices |
| Y81.1      | Therapeutic (nonsurgical) and rehabilitative general- and plastic-surgery devices associated with adverse incidents            | 5 - Medical or surgical devices |
| Y81.2      | Prosthetic and other implants, materials and accessory general- and plastic-surgery devices associated with adverse incidents  | 5 - Medical or surgical devices |
| Y81.3      | Surgical instruments, materials and general- and plastic-surgery devices (including sutures) associated with adverse incidents | 5 - Medical or surgical devices |
| Y81.8      | Miscellaneous general- and plastic-surgery devices associated with adverse incidents, not elsewhere classified                 | 5 - Medical or surgical devices |
| <b>Y82</b> | <b>Other and unspecified medical devices associated with adverse incidents</b>                                                 | 5 - Medical or surgical devices |
| Y82.0      | Diagnostic and monitoring devices                                                                                              | 5 - Medical or surgical devices |
| Y82.1      | Therapeutic (nonsurgical) and rehabilitative devices                                                                           | 5 - Medical or surgical devices |
| Y82.2      | Prosthetic and other implants, materials and accessory devices                                                                 | 5 - Medical or surgical devices |

|            |                                                                                                                                                                                                        |                                                |
|------------|--------------------------------------------------------------------------------------------------------------------------------------------------------------------------------------------------------|------------------------------------------------|
| Y82.3      | Surgical instruments, materials and devices (including sutures)                                                                                                                                        | 5 - Medical or surgical devices                |
| Y82.8      | Other medical devices associated with adverse incidents                                                                                                                                                | 5 - Medical or surgical devices                |
| Y82.9      | Unspecified medical devices associated with adverse incidents                                                                                                                                          | 5 - Medical or surgical devices                |
| <b>Y83</b> | <b>Surgical operation and other surgical procedures as the cause of abnormal reaction of the patient, or of later complication, without mention of misadventure at the time of the procedure</b>       | 2 - Surgical and peri-operative adverse events |
| Y83.0      | Surgical operation with transplant of whole organ as the cause of abnormal reaction of the patient, or of later complication, without mention of misadventure at the time of the procedure             | 2 - Surgical and peri-operative adverse events |
| Y83.1      | Surgical operation with implant of artificial internal device as the cause of abnormal reaction of the patient, or of later complication, without mention of misadventure at the time of the procedure | 5 - Medical or surgical devices                |
| Y83.2      | Surgical operation with anastomosis, bypass or graft as the cause of abnormal reaction of the patient, or of later complication, without mention of misadventure at the time of the procedure          | 2 - Surgical and peri-operative adverse events |
| Y83.3      | Surgical operation with formation of external stoma as the cause of abnormal reaction of the patient, or of later complication, without mention of misadventure at the time of the procedure           | 2 - Surgical and peri-operative adverse events |
| Y83.4      | Other reconstructive surgery as the cause of abnormal reaction of the patient, or of later complication, without mention of misadventure at the time of the procedure                                  | 2 - Surgical and peri-operative adverse events |
| Y83.5      | Amputation of limb(s) as the cause of abnormal reaction of the patient, or of later complication, without mention of misadventure at the time of the procedure                                         | 2 - Surgical and peri-operative adverse events |
| Y83.6      | Removal of other organ (partial) (total) as the cause of abnormal reaction of the patient, or of later complication, without mention of misadventure at the time of the procedure                      | 2 - Surgical and peri-operative adverse events |
| Y83.8      | Other surgical procedures as the cause of abnormal reaction of the patient, or of later complication, without mention of misadventure at the time of the procedure                                     | 2 - Surgical and peri-operative adverse events |
| Y83.9      | Surgical procedure, unspecified as the cause of abnormal reaction of the patient, or of later complication, without mention of misadventure at the time of the procedure                               | 2 - Surgical and peri-operative adverse events |
| <b>Y84</b> | <b>Other medical procedures as the cause of abnormal reaction of the patient, or of later complication, without mention of misadventure at the time of the procedure</b>                               | 4 - Medical management                         |
| Y84.0      | Cardiac catheterization as the cause of abnormal reaction of the patient, or of later complication, without mention of misadventure at the time of the procedure                                       | 2 - Surgical and peri-operative adverse events |
| Y84.1      | Kidney dialysis as the cause of abnormal reaction of the patient, or of later complication, without mention of misadventure at the time of the procedure                                               | 4 - Medical management                         |
| Y84.2      | Radiological procedure and radiotherapy as the cause of abnormal reaction of the patient, or of later complication, without mention of misadventure at the time of the procedure                       | 4 - Medical management                         |
| Y84.3      | Shock therapy as the cause of abnormal reaction of the patient, or of later complication, without mention of misadventure at the time of the procedure                                                 | 4 - Medical management                         |
| Y84.4      | Aspiration of fluid as the cause of abnormal reaction of the patient, or of later complication, without mention of misadventure at the time of the procedure                                           | 4 - Medical management                         |
| Y84.5      | Insertion of gastric or duodenal sound as the cause of abnormal reaction of the patient, or of later complication, without mention of misadventure at the time of the procedure                        | 4 - Medical management                         |
| Y84.6      | Urinary catheterization as the cause of abnormal reaction of the patient, or of later complication, without mention of misadventure at the time of the procedure                                       | 4 - Medical management                         |
| Y84.7      | Blood-sampling as the cause of abnormal reaction of the patient, or of later complication, without mention of misadventure at the time of the procedure                                                | 4 - Medical management                         |
| Y84.8      | Other medical procedures as the cause of abnormal reaction of the patient, or of later complication, without mention of misadventure at the time of the procedure                                      | 4 - Medical management                         |
| Y84.9      | Medical procedure, unspecified as the cause of abnormal reaction of the patient, or of later complication, without mention of misadventure at the time of the procedure                                | 4 - Medical management                         |
| <b>Y88</b> | <b>Sequelae with surgical and medical care as external cause</b>                                                                                                                                       | 2 - Surgical and peri-operative adverse events |
| Y88.0      | Sequelae of adverse effects caused by drugs, medicaments and biological substances in therapeutic use                                                                                                  | 1 - Adverse drug events                        |
| Y88.1      | Sequelae of misadventures to patients during surgical and medical procedures                                                                                                                           | 3 - Misadventure                               |
| Y88.2      | Sequelae of adverse incidents associated with medical devices in diagnostic and therapeutic use                                                                                                        | 5 - Medical or surgical devices                |
| Y88.3      | Sequelae of surgical and medical procedures as the cause of abnormal reaction of the patient, or of later complication, without mention of misadventure at the time of the procedure                   | 2 - Surgical and peri-operative adverse events |

**eTable 3.** Selected cause-of-death ensemble modeling (CODEm) covariates used to generate the adverse effects of medical harm (AEMT) models.

| Covariate                          | level |
|------------------------------------|-------|
| Health system access quality index | 2     |
| Lag distribution income per capita | 3     |
| Sociodemographic index             | 3     |

**eTable 4.** Result of redistribution of Garbage codes on AEMT as underlying cause by different non underlying cause by ICD9 and ICD10

| Underlying Cause            | ICD10 | ICD9  |
|-----------------------------|-------|-------|
| Original (raw data)         | 74.1% | 81.1% |
| Sepsis                      | 5.8%  | 3.1%  |
| Hyperkalemia                | 2.7%  | 2.2%  |
| Atrial flutter/fibrillation | 2.7%  | 1.5%  |
| Peritonitis                 | 2.5%  | 1.3%  |
| Osteomyelitis               | 1.9%  | 1.2%  |
| Arrhythmia                  | 1.4%  | 1.1%  |
| Unspecified factor X59      | 1.4%  | 1.1%  |
| Renal failure               | 1.3%  | 1.0%  |
| Shock and cardiac arrest    | 0.9%  | 0.9%  |
| All, ill-defined            | 0.9%  | 0.9%  |
| External causes             | 0.9%  | 0.6%  |
| Anemia unspecified          | 0.5%  | 0.5%  |
| Arterial embolism           | 0.5%  | 0.5%  |
| Toxic encephalopathy        | 0.5%  | 0.5%  |
| Pyothorax                   | 0.3%  | 0.4%  |
| Pneumonitis                 | 0.3%  | 0.3%  |
| Pleurisy                    | 0.3%  | 0.2%  |
| All garbage package         | 0.2%  | 0.2%  |
| Cerebral palsy              | 0.2%  | 0.2%  |
| Asphyxia and hypoxemia      | 0.2%  | 0.2%  |
| USA Armed Forces accident   | 0.1%  | 0.2%  |
| Urinary obstruction         | 0.1%  | 0.1%  |
| Fistula                     | 0.1%  | 0.1%  |
| Cerebral edema              | 0.1%  | 0.1%  |
| Other                       | 0.2%  | 0.1%  |

**eTable 5.** Frequency of causes of death in the cause-of-death (COD) chain when Adverse Effects of Medical Treatment (AEMT) is the underlying cause of death, US 1980-2014.

|                            | Non-underlying causes of death                | AEMT by type        |                                            |              |                    |                             |        | All types of AEMT per 1000 | Death totals of other causes in the chain when AEMT is the underlying cause of death |
|----------------------------|-----------------------------------------------|---------------------|--------------------------------------------|--------------|--------------------|-----------------------------|--------|----------------------------|--------------------------------------------------------------------------------------|
|                            |                                               | Adverse drug events | Surgical and peri-operative adverse events | Misadventure | Medical management | Medical or surgical devices | Other  |                            |                                                                                      |
| External cause of Injuries | All External cause of Injuries                | 464.74              | 307.25                                     | 325.17       | 391.34             | 960.72                      | 127.21 | 363.02                     | 39,620                                                                               |
|                            | Specific anatomic injuries (ICD N-codes)      | 402.27              | 280.76                                     | 258.11       | 373.78             | 947.28                      | 111.31 | 331.76                     | 36,209                                                                               |
|                            | Unintentional injuries other                  | 14.43               | 11.31                                      | 24.39        | 10.81              | 3.66                        | 8.83   | 12.28                      | 1,340                                                                                |
|                            | Transport injuries                            | 3.30                | 5.97                                       | 18.16        | 2.62               | 0.61                        | 0.00   | 6.03                       | 658                                                                                  |
|                            | Falls                                         | 5.15                | 5.20                                       | 4.62         | 0.92               | 9.16                        | 5.30   | 4.73                       | 516                                                                                  |
|                            | Interpersonal violence                        | 33.40               | 1.83                                       | 3.65         | 0.26               | 0.00                        | 0.00   | 4.48                       | 489                                                                                  |
|                            | Self-harm                                     | 5.57                | 1.95                                       | 13.86        | 2.62               | 0.00                        | 1.77   | 3.29                       | 359                                                                                  |
|                            | Fire, heat, and hot substances                | 0.62                | 0.23                                       | 2.36         | 0.33               | 0.00                        | 0.00   | 0.45                       | 49                                                                                   |
| Chronic infectious disease | All Chronic infectious disease                | 7.53                | 3.65                                       | 7.31         | 5.18               | 1.63                        | 1.77   | 4.42                       | 482                                                                                  |
|                            | Tuberculosis                                  | 1.13                | 1.31                                       | 2.90         | 1.24               | 0.20                        | 0.00   | 1.37                       | 149                                                                                  |
|                            | Fever Unknown                                 | 4.43                | 0.86                                       | 1.07         | 1.97               | 0.61                        | 0.00   | 1.34                       | 146                                                                                  |
|                            | CNS Abscess                                   | 1.24                | 0.82                                       | 1.29         | 1.57               | 0.61                        | 1.77   | 1.00                       | 109                                                                                  |
|                            | Salpingitis                                   | 0.00                | 0.49                                       | 1.72         | 0.13               | 0.20                        | 0.00   | 0.49                       | 53                                                                                   |
|                            | Syphilis                                      | 0.62                | 0.07                                       | 0.11         | 0.20               | 0.00                        | 0.00   | 0.14                       | 15                                                                                   |
|                            | Gonococcal infection                          | 0.00                | 0.01                                       | 0.21         | 0.00               | 0.00                        | 0.00   | 0.03                       | 3                                                                                    |
|                            | Cerebral Cysts                                | 0.00                | 0.03                                       | 0.00         | 0.00               | 0.00                        | 0.00   | 0.02                       | 2                                                                                    |
|                            | Other sexually transmitted diseases           | 0.00                | 0.03                                       | 0.00         | 0.00               | 0.00                        | 0.00   | 0.02                       | 2                                                                                    |
|                            | Cysticercosis                                 | 0.00                | 0.01                                       | 0.00         | 0.00               | 0.00                        | 0.00   | 0.01                       | 1                                                                                    |
|                            | Unspecified Parasitic D                       | 0.10                | 0.00                                       | 0.00         | 0.00               | 0.00                        | 0.00   | 0.01                       | 1                                                                                    |
| Genital herpes             | 0.00                                          | 0.00                | 0.00                                       | 0.07         | 0.00               | 0.00                        | 0.01   | 1                          |                                                                                      |
| Congenital birth defects   | All Congenital birth defects                  | 8.04                | 9.45                                       | 27.51        | 10.16              | 4.88                        | 7.07   | 10.75                      | 1,173                                                                                |
|                            | Congenital heart anomalies                    | 2.27                | 3.13                                       | 14.83        | 2.56               | 1.83                        | 3.53   | 3.91                       | 427                                                                                  |
|                            | Other congenital birth defects                | 2.47                | 1.59                                       | 4.84         | 3.21               | 0.81                        | 0.00   | 2.13                       | 232                                                                                  |
|                            | Congenital musculoskeletal and limb anomalies | 0.82                | 1.50                                       | 1.72         | 1.24               | 1.22                        | 1.77   | 1.41                       | 154                                                                                  |
|                            | Down syndrome                                 | 0.52                | 1.12                                       | 1.18         | 1.05               | 0.20                        | 0.00   | 1.02                       | 111                                                                                  |
|                            | Digestive congenital anomalies                | 0.41                | 0.79                                       | 2.58         | 0.79               | 0.20                        | 0.00   | 0.88                       | 96                                                                                   |
|                            | Neural tube defects                           | 0.41                | 0.56                                       | 1.07         | 0.52               | 0.00                        | 0.00   | 0.56                       | 61                                                                                   |
|                            | Other chromosomal abnormalities               | 0.31                | 0.42                                       | 0.21         | 0.46               | 0.20                        | 0.00   | 0.38                       | 42                                                                                   |
|                            | Unspecified Congenital diseases               | 0.21                | 0.22                                       | 0.11         | 0.20               | 0.00                        | 1.77   | 0.20                       | 22                                                                                   |
|                            | Urogenital congenital anomalies               | 0.62                | 0.04                                       | 0.97         | 0.07               | 0.00                        | 0.00   | 0.17                       | 19                                                                                   |
|                            | Turner syndrome                               | 0.00                | 0.03                                       | 0.00         | 0.00               | 0.41                        | 0.00   | 0.04                       | 4                                                                                    |

|                                   |                                                         |        |        |        |        |       |        |        |        |
|-----------------------------------|---------------------------------------------------------|--------|--------|--------|--------|-------|--------|--------|--------|
|                                   | Cleft lip and cleft palate                              | 0.00   | 0.04   | 0.00   | 0.07   | 0.00  | 0.00   | 0.04   | 4      |
|                                   | Klinefelter syndrome                                    | 0.00   | 0.01   | 0.00   | 0.00   | 0.00  | 0.00   | 0.01   | 1      |
| Digestive diseases                | All Digestive diseases                                  | 111.75 | 237.50 | 178.49 | 130.71 | 79.99 | 219.08 | 199.17 | 21,738 |
|                                   | Paralytic ileus and intestinal obstruction              | 2.68   | 65.34  | 11.07  | 7.34   | 6.31  | 1.77   | 44.04  | 4,807  |
|                                   | Unspecified Digestive Diseases                          | 9.48   | 31.53  | 20.85  | 29.75  | 8.55  | 22.97  | 27.33  | 2,983  |
|                                   | Vascular intestinal disorders                           | 3.92   | 38.09  | 8.70   | 5.50   | 6.51  | 42.40  | 26.59  | 2,902  |
|                                   | Cirrhosis and other chronic liver diseases              | 38.35  | 21.80  | 43.95  | 27.06  | 22.19 | 33.57  | 25.98  | 2,835  |
|                                   | Other digestive diseases                                | 2.99   | 23.92  | 8.60   | 6.75   | 1.22  | 3.53   | 17.23  | 1,880  |
|                                   | Gastrointestinal Bleeding                               | 24.85  | 13.94  | 15.37  | 19.59  | 12.42 | 68.90  | 16.03  | 1,750  |
|                                   | Peptic ulcer disease                                    | 9.38   | 8.68   | 9.35   | 7.60   | 3.46  | 3.53   | 8.38   | 915    |
|                                   | Gallbladder and biliary diseases                        | 3.20   | 6.77   | 17.52  | 3.34   | 4.07  | 10.60  | 6.79   | 741    |
|                                   | Inguinal, femoral, and abdominal hernia                 | 0.72   | 6.60   | 3.12   | 0.79   | 1.42  | 0.00   | 4.70   | 513    |
|                                   | Inflammatory bowel disease                              | 5.46   | 3.96   | 4.84   | 6.49   | 3.46  | 14.13  | 4.55   | 497    |
|                                   | Gastroesophageal reflux disease                         | 2.68   | 3.26   | 12.14  | 4.65   | 3.46  | 3.53   | 4.17   | 455    |
|                                   | Pancreatitis                                            | 4.23   | 3.30   | 5.91   | 3.08   | 1.63  | 5.30   | 3.51   | 383    |
|                                   | Ascites                                                 | 0.72   | 3.66   | 3.98   | 3.93   | 1.02  | 0.00   | 3.33   | 363    |
|                                   | Diverticular disease of intestines                      | 0.62   | 3.47   | 7.09   | 1.70   | 2.24  | 5.30   | 3.23   | 353    |
|                                   | Appendicitis                                            | 0.31   | 1.41   | 2.26   | 0.66   | 0.20  | 0.00   | 1.22   | 133    |
|                                   | Hemorrhoids, anal fissure, anal abscess, and fistula    | 0.52   | 0.82   | 2.36   | 1.44   | 0.61  | 1.77   | 1.01   | 110    |
| Gastritis and duodenitis          | 1.44                                                    | 0.71   | 0.64   | 0.79   | 1.02   | 1.77  | 0.80   | 87     |        |
| Musculoskeletal disorders         | Liver Abscess                                           | 0.10   | 0.19   | 0.64   | 0.26   | 0.20  | 0.00   | 0.23   | 25     |
|                                   | Celiac disease                                          | 0.10   | 0.06   | 0.11   | 0.00   | 0.00  | 0.00   | 0.05   | 6      |
| Musculoskeletal disorders         | Musculoskeletal disorders                               | 23.51  | 10.78  | 10.21  | 14.35  | 16.08 | 21.20  | 12.65  | 1,381  |
| acute infectious diseases         | All acute infectious diseases                           | 24.74  | 15.35  | 14.29  | 34.27  | 21.37 | 28.27  | 19.08  | 2,082  |
|                                   | Unspecified Infectious diseases                         | 6.80   | 6.50   | 1.93   | 12.64  | 12.01 | 8.83   | 7.26   | 792    |
|                                   | opportunistic infectious                                | 11.75  | 4.25   | 2.90   | 13.56  | 4.27  | 8.83   | 6.13   | 669    |
|                                   | Other Infectious diseases                               | 3.09   | 2.08   | 2.04   | 5.44   | 2.85  | 5.30   | 2.68   | 293    |
|                                   | Hepatitis                                               | 1.96   | 1.12   | 5.37   | 1.31   | 1.02  | 5.30   | 1.60   | 175    |
| Meningitis                        | 1.13                                                    | 1.40   | 2.04   | 1.31   | 1.22   | 0.00  | 1.40   | 153    |        |
| Urogenital diseases               | All Urogenital diseases                                 | 34.64  | 52.04  | 71.89  | 65.19  | 24.63 | 63.60  | 52.85  | 5,768  |
|                                   | Urinary diseases                                        | 33.81  | 38.45  | 67.81  | 63.81  | 24.22 | 63.60  | 43.58  | 4,756  |
|                                   | Gynecological diseases                                  | 0.82   | 13.59  | 4.08   | 1.38   | 0.41  | 0.00   | 9.27   | 1,012  |
| Endocrine and metabolic disorders | All Endocrine and metabolic disorders                   | 88.14  | 50.78  | 39.97  | 38.59  | 70.63 | 95.41  | 52.60  | 5,741  |
|                                   | Obesity                                                 | 17.53  | 25.13  | 12.47  | 10.42  | 29.51 | 12.37  | 21.45  | 2,341  |
|                                   | Other endocrine, metabolic, blood, and immune disorders | 56.60  | 14.76  | 20.74  | 17.49  | 15.67 | 61.84  | 19.65  | 2,145  |
|                                   | Lipoprotein metabolism and                              | 6.19   | 4.71   | 2.15   | 3.08   | 14.45 | 12.37  | 4.87   | 532    |

|                                          |                                               |        |        |        |        |        |        |        |        |
|------------------------------------------|-----------------------------------------------|--------|--------|--------|--------|--------|--------|--------|--------|
|                                          | other lipidaemias disorders                   |        |        |        |        |        |        |        |        |
|                                          | Hypothyroidism                                | 5.67   | 2.98   | 1.72   | 3.01   | 10.38  | 5.30   | 3.46   | 378    |
|                                          | Unspecified Endocrine&Metabolic Diseases      | 1.24   | 2.03   | 1.18   | 2.95   | 0.20   | 1.77   | 1.93   | 211    |
|                                          | Unspecified Immunodeficiency                  | 0.52   | 0.43   | 1.40   | 1.18   | 0.00   | 0.00   | 0.60   | 66     |
|                                          | Cystic fibrosis                               | 0.10   | 0.42   | 0.21   | 0.13   | 0.00   | 1.77   | 0.32   | 35     |
|                                          | Hyperthyroidism                               | 0.31   | 0.32   | 0.11   | 0.33   | 0.41   | 0.00   | 0.30   | 33     |
| Blood Disorders                          | All Blood Disorders                           | 22.27  | 14.57  | 13.22  | 26.34  | 28.09  | 107.77 | 17.88  | 1,951  |
|                                          | Anemia                                        | 15.26  | 13.32  | 11.39  | 21.62  | 26.66  | 65.37  | 15.36  | 1,676  |
|                                          | G6PD deficiency                               | 5.88   | 0.88   | 1.40   | 3.73   | 1.42   | 15.90  | 1.87   | 204    |
|                                          | Thalassemias                                  | 0.82   | 0.27   | 0.43   | 0.52   | 0.00   | 3.53   | 0.38   | 41     |
|                                          | Unspecified Blood D                           | 0.31   | 0.09   | 0.00   | 0.39   | 0.00   | 22.97  | 0.26   | 28     |
|                                          | Sickle cell disorders                         | 0.00   | 0.01   | 0.00   | 0.07   | 0.00   | 0.00   | 0.02   | 2      |
| Sense organ diseases                     | Sense organ diseases                          | 0.00   | 0.03   | 0.00   | 0.00   | 0.00   | 0.00   | 0.02   | 2      |
| Diarrheal diseases                       | Diarrheal diseases                            | 4.64   | 1.97   | 1.18   | 2.69   | 5.09   | 15.90  | 2.46   | 268    |
| Impossible cause for death               | impossible cause for death                    | 164.43 | 240.70 | 65.44  | 173.03 | 708.12 | 173.14 | 230.21 | 25,125 |
| Skin Diseases                            | Skin Diseases                                 | 35.67  | 23.55  | 6.23   | 30.20  | 17.91  | 8.83   | 23.75  | 2,592  |
| Maternal disorders                       | Maternal disorders                            | 1.86   | 0.39   | 3.87   | 0.46   | 0.41   | 0.00   | 0.82   | 90     |
| Mental disorders                         | All Mental disorders                          | 49.59  | 11.17  | 29.23  | 14.15  | 8.75   | 14.13  | 16.45  | 1,795  |
|                                          | Drug use disorders                            | 31.34  | 4.22   | 10.85  | 5.44   | 1.42   | 3.53   | 7.24   | 790    |
|                                          | Alcohol use disorders                         | 14.74  | 5.16   | 16.66  | 6.16   | 5.70   | 8.83   | 7.17   | 783    |
|                                          | Mental disorders                              | 3.51   | 1.79   | 1.72   | 2.56   | 1.63   | 1.77   | 2.03   | 222    |
| Kidney disease                           | kidney disease                                | 126.29 | 92.96  | 80.92  | 110.07 | 126.20 | 219.08 | 99.44  | 10,853 |
| Nutritional deficiencies                 | Nutritional deficiencies                      | 6.91   | 16.79  | 8.60   | 23.59  | 15.67  | 12.37  | 16.09  | 1,756  |
| Chronic intermediate and immediate cause | All Chronic intermediate and immediate cause  | 31.65  | 47.63  | 32.13  | 71.41  | 39.69  | 28.27  | 47.75  | 5,212  |
|                                          | Pneumonitis                                   | 15.88  | 18.72  | 10.96  | 31.25  | 14.86  | 7.07   | 19.32  | 2,109  |
|                                          | Senility                                      | 4.02   | 10.07  | 2.36   | 11.40  | 10.58  | 5.30   | 9.06   | 989    |
|                                          | different type of Paralysis                   | 3.20   | 6.34   | 3.44   | 11.33  | 2.65   | 0.00   | 6.31   | 689    |
|                                          | Respiratory Failure Chronic                   | 2.89   | 5.00   | 7.95   | 5.31   | 1.22   | 7.07   | 4.95   | 540    |
|                                          | Cachexia                                      | 2.27   | 3.18   | 2.47   | 6.16   | 3.26   | 1.77   | 3.45   | 377    |
|                                          | Osteomyelitis                                 | 1.86   | 1.71   | 1.50   | 1.57   | 3.87   | 0.00   | 1.78   | 194    |
|                                          | Cerebral Palsy                                | 0.93   | 1.41   | 2.36   | 2.62   | 1.22   | 1.77   | 1.61   | 176    |
|                                          | Hydrocephalus                                 | 0.31   | 0.58   | 0.00   | 0.66   | 1.42   | 0.00   | 0.55   | 60     |
|                                          | Fistula                                       | 0.10   | 0.39   | 0.32   | 0.66   | 0.00   | 0.00   | 0.38   | 41     |
|                                          | Amyloidosis                                   | 0.21   | 0.22   | 0.75   | 0.46   | 0.61   | 5.30   | 0.34   | 37     |
| Cardiovascular diseases                  | All Cardiovascular diseases                   | 462.27 | 467.05 | 553.41 | 438.31 | 660.70 | 818.02 | 480.51 | 52,443 |
|                                          | Ischemic heart disease                        | 115.05 | 107.53 | 139.26 | 87.07  | 145.94 | 157.24 | 110.03 | 12,009 |
|                                          | Heart failure                                 | 59.48  | 72.23  | 54.05  | 67.16  | 82.43  | 70.67  | 69.29  | 7,562  |
|                                          | Hypertension                                  | 55.88  | 51.85  | 32.45  | 50.12  | 108.69 | 90.11  | 53.07  | 5,792  |
|                                          | Cerebrovascular disease                       | 59.69  | 40.88  | 28.15  | 70.17  | 38.47  | 183.75 | 46.20  | 5,042  |
|                                          | Pulmonary Embolism                            | 14.43  | 44.86  | 12.14  | 13.23  | 53.33  | 75.97  | 35.49  | 3,873  |
|                                          | Unspecified CVD                               | 25.46  | 30.32  | 58.46  | 23.52  | 37.66  | 33.57  | 31.68  | 3,458  |
|                                          | Atrial fibrillation and flutter               | 27.32  | 21.67  | 9.13   | 19.98  | 50.27  | 24.73  | 22.17  | 2,420  |
|                                          | Other cardiovascular and circulatory diseases | 9.59   | 12.09  | 62.76  | 13.63  | 9.16   | 14.13  | 16.28  | 1,777  |
|                                          | Atherosclerosis                               | 8.76   | 12.51  | 20.20  | 12.45  | 4.48   | 3.53   | 12.42  | 1,355  |

|                                         |                                     |       |       |        |       |       |        |       |       |
|-----------------------------------------|-------------------------------------|-------|-------|--------|-------|-------|--------|-------|-------|
|                                         | Nonrheumatic valvular disorders     | 10.82 | 10.16 | 22.78  | 8.06  | 39.49 | 22.97  | 12.39 | 1,352 |
|                                         | Peripheral artery disease           | 8.97  | 12.83 | 7.31   | 10.81 | 8.55  | 19.43  | 11.57 | 1,263 |
|                                         | Hypertensive heart disease          | 16.80 | 8.20  | 31.06  | 11.40 | 8.55  | 1.77   | 11.34 | 1,238 |
|                                         | Cardiovascular diseases             | 10.52 | 9.25  | 15.04  | 14.87 | 8.14  | 10.60  | 10.60 | 1,157 |
|                                         | Cardiomyopathy and myocarditis      | 16.19 | 6.86  | 11.82  | 11.47 | 12.82 | 8.83   | 9.03  | 986   |
|                                         | Aortic aneurysm                     | 3.40  | 6.85  | 16.44  | 3.93  | 3.87  | 5.30   | 6.81  | 743   |
|                                         | Phlebitis and thrombophlebitis      | 8.04  | 6.04  | 5.27   | 5.77  | 13.23 | 67.14  | 6.75  | 737   |
|                                         | Rheumatic heart disease             | 4.33  | 4.74  | 16.98  | 3.34  | 14.25 | 12.37  | 6.02  | 657   |
|                                         | Endocarditis                        | 4.74  | 4.52  | 6.02   | 8.06  | 18.93 | 5.30   | 5.82  | 635   |
|                                         | Arterial Embolism                   | 2.47  | 3.49  | 3.87   | 2.95  | 2.04  | 10.60  | 3.33  | 363   |
|                                         | Varicose veins                      | 0.31  | 0.17  | 0.21   | 0.33  | 0.41  | 0.00   | 0.22  | 24    |
| Neoplasm                                | All neoplasm                        | 74.33 | 54.96 | 153.13 | 86.03 | 43.56 | 100.71 | 69.12 | 7,544 |
|                                         | Cancer with Unspecified site        | 13.51 | 10.48 | 32.77  | 16.44 | 6.31  | 14.13  | 13.31 | 1,453 |
|                                         | Colon and rectum cancer             | 5.15  | 8.60  | 18.70  | 5.77  | 4.48  | 1.77   | 8.54  | 932   |
|                                         | Tracheal, bronchus, and lung cancer | 9.48  | 5.61  | 27.40  | 7.80  | 3.26  | 1.77   | 7.99  | 872   |
|                                         | Leukemia                            | 7.63  | 2.62  | 7.52   | 11.20 | 2.85  | 38.87  | 4.88  | 533   |
|                                         | Breast cancer                       | 6.70  | 3.69  | 5.70   | 6.09  | 5.29  | 1.77   | 4.53  | 494   |
|                                         | Other neoplasms                     | 3.81  | 3.39  | 6.23   | 4.85  | 3.26  | 26.50  | 3.99  | 435   |
|                                         | Prostate cancer                     | 3.20  | 3.23  | 5.16   | 6.55  | 5.90  | 0.00   | 3.96  | 432   |
|                                         | Non-Hodgkin lymphoma                | 7.84  | 1.82  | 3.98   | 6.09  | 2.04  | 7.07   | 3.17  | 346   |
|                                         | Brain and nervous system cancer     | 2.47  | 2.06  | 3.76   | 2.03  | 0.81  | 0.00   | 2.17  | 237   |
|                                         | Bladder cancer                      | 1.86  | 1.86  | 3.12   | 1.77  | 1.42  | 1.77   | 1.93  | 211   |
|                                         | Kidney cancer                       | 1.96  | 1.24  | 3.98   | 1.70  | 1.02  | 1.77   | 1.59  | 174   |
|                                         | Pancreatic cancer                   | 0.93  | 0.99  | 4.84   | 1.70  | 0.41  | 1.77   | 1.39  | 152   |
|                                         | Esophageal cancer                   | 0.21  | 1.15  | 5.05   | 1.24  | 0.81  | 0.00   | 1.39  | 152   |
|                                         | Multiple myeloma                    | 2.06  | 0.71  | 2.58   | 2.36  | 1.22  | 3.53   | 1.26  | 137   |
|                                         | Ovarian cancer                      | 1.03  | 1.10  | 2.47   | 1.11  | 0.81  | 0.00   | 1.19  | 130   |
|                                         | Stomach cancer                      | 0.52  | 1.04  | 3.12   | 1.11  | 0.41  | 0.00   | 1.15  | 125   |
|                                         | Larynx cancer                       | 0.41  | 0.98  | 2.15   | 0.79  | 0.61  | 0.00   | 0.98  | 107   |
|                                         | Liver cancer                        | 0.82  | 0.52  | 3.65   | 1.18  | 0.20  | 0.00   | 0.89  | 97    |
|                                         | Lip and oral cavity cancer          | 0.62  | 0.69  | 1.50   | 0.92  | 0.41  | 0.00   | 0.77  | 84    |
|                                         | Cervical cancer                     | 0.21  | 0.53  | 2.58   | 1.18  | 0.41  | 0.00   | 0.76  | 83    |
|                                         | Uterine cancer                      | 0.21  | 0.71  | 1.07   | 0.59  | 0.41  | 0.00   | 0.66  | 72    |
|                                         | Non-melanoma skin cancer            | 0.62  | 0.49  | 0.54   | 0.66  | 0.20  | 0.00   | 0.51  | 56    |
|                                         | Hodgkin lymphoma                    | 1.24  | 0.27  | 1.07   | 0.92  | 0.20  | 0.00   | 0.51  | 56    |
|                                         | Malignant skin melanoma             | 0.82  | 0.27  | 0.64   | 0.52  | 0.41  | 0.00   | 0.39  | 43    |
|                                         | Other pharynx cancer                | 0.10  | 0.26  | 1.40   | 0.39  | 0.00  | 0.00   | 0.35  | 38    |
|                                         | Thyroid cancer                      | 0.31  | 0.24  | 0.97   | 0.33  | 0.41  | 0.00   | 0.33  | 36    |
| Gallbladder and biliary tract cancer    | 0.10                                | 0.33  | 0.64  | 0.26   | 0.00  | 0.00  | 0.31   | 34    |       |
| Testicular cancer                       | 0.31                                | 0.04  | 0.21  | 0.20   | 0.00  | 0.00  | 0.10   | 11    |       |
| Nasopharynx cancer                      | 0.10                                | 0.04  | 0.32  | 0.20   | 0.00  | 0.00  | 0.09   | 10    |       |
| Mesothelioma                            | 0.10                                | 0.00  | 0.00  | 0.07   | 0.00  | 0.00  | 0.02   | 2     |       |
| Diabetes and diabetes related disorders | 69.59                               | 66.53 | 43.63 | 71.28  | 89.76 | 91.87 | 66.69  | 7,279 |       |



|                                        |                                                     |        |        |        |        |        |        |        |        |
|----------------------------------------|-----------------------------------------------------|--------|--------|--------|--------|--------|--------|--------|--------|
| Acute intermediate and immediate cause | All Acute intermediate and immediate cause          | 609.90 | 718.44 | 590.80 | 748.21 | 638.92 | 602.47 | 697.90 | 76,169 |
|                                        | Sepsis                                              | 75.15  | 210.17 | 111.97 | 249.10 | 248.52 | 164.31 | 196.73 | 21,471 |
|                                        | Shock& Cardiac Arrest                               | 181.55 | 198.09 | 95.85  | 160.91 | 166.09 | 185.51 | 181.20 | 19,776 |
|                                        | Asphyxia & Hypoxemia                                | 79.07  | 88.45  | 50.61  | 86.61  | 38.27  | 33.57  | 81.59  | 8,905  |
|                                        | Respiratory Failure Acute                           | 78.35  | 67.33  | 28.37  | 77.44  | 90.17  | 123.67 | 67.72  | 7,391  |
|                                        | Coma & Stupor                                       | 25.57  | 44.36  | 60.93  | 50.06  | 1.22   | 1.77   | 42.73  | 4,664  |
|                                        | Peritonitis                                         | 3.81   | 28.94  | 94.56  | 26.01  | 3.46   | 5.30   | 30.62  | 3,342  |
|                                        | Dehydration and Acid-Base disorders                 | 29.59  | 23.65  | 15.04  | 28.17  | 19.54  | 30.04  | 23.92  | 2,611  |
|                                        | Flutter, Fibrillation, Arrhythmia                   | 20.31  | 14.08  | 12.68  | 13.17  | 32.57  | 17.67  | 15.24  | 1,663  |
|                                        | Brain Anoxia                                        | 44.74  | 8.37   | 8.38   | 14.74  | 17.10  | 10.60  | 12.90  | 1,408  |
|                                        | Hemorrhage, Unspecified                             | 2.78   | 5.92   | 70.92  | 8.12   | 0.00   | 0.00   | 11.20  | 1,222  |
|                                        | Convulsions                                         | 25.88  | 7.75   | 4.30   | 14.48  | 4.68   | 1.77   | 9.84   | 1,074  |
|                                        | Pulmonary Edema                                     | 16.49  | 7.23   | 6.13   | 7.60   | 6.92   | 5.30   | 7.99   | 872    |
|                                        | Acute Abdomen                                       | 4.43   | 8.52   | 2.69   | 1.64   | 0.81   | 1.77   | 6.31   | 689    |
|                                        | Hemothorax                                          | 0.62   | 0.52   | 23.21  | 1.64   | 1.42   | 0.00   | 2.66   | 290    |
|                                        | Encephalopathy                                      | 2.68   | 1.10   | 0.32   | 2.69   | 2.44   | 3.53   | 1.47   | 160    |
|                                        | Hepatic Failure                                     | 6.29   | 0.69   | 1.61   | 0.92   | 0.41   | 7.07   | 1.32   | 144    |
|                                        | Nausea And Vomiting                                 | 2.27   | 0.98   | 0.43   | 1.18   | 0.41   | 0.00   | 1.04   | 114    |
|                                        | Compression of Brain                                | 2.68   | 0.65   | 0.64   | 0.85   | 1.22   | 3.53   | 0.90   | 98     |
|                                        | Cerebral Edema                                      | 1.86   | 0.69   | 0.54   | 0.52   | 1.83   | 3.53   | 0.82   | 90     |
|                                        | Pulmonary Collapse                                  | 2.16   | 0.48   | 0.43   | 0.66   | 0.41   | 0.00   | 0.64   | 70     |
|                                        | Intracranial Hypertension                           | 0.41   | 0.35   | 0.21   | 0.26   | 0.61   | 1.77   | 0.35   | 38     |
|                                        | Sudden infant death syndrome                        | 0.93   | 0.01   | 0.00   | 1.18   | 0.00   | 0.00   | 0.26   | 28     |
|                                        | Toxic liver disease                                 | 1.44   | 0.01   | 0.00   | 0.07   | 0.00   | 0.00   | 0.15   | 16     |
|                                        | Interstitial Emphysema                              | 0.10   | 0.04   | 0.86   | 0.07   | 0.00   | 0.00   | 0.12   | 13     |
|                                        | Toxic Encephalopathy                                | 0.41   | 0.07   | 0.00   | 0.00   | 0.20   | 0.00   | 0.09   | 10     |
|                                        | Acquired hemolytic anemia                           | 0.31   | 0.00   | 0.11   | 0.13   | 0.61   | 1.77   | 0.09   | 10     |
| Neurological disorders                 | All Neurological disorders                          | 63.40  | 59.16  | 54.37  | 98.47  | 76.74  | 40.64  | 65.32  | 7,129  |
|                                        | Alzheimer disease and other dementias               | 17.22  | 31.66  | 14.83  | 58.25  | 57.40  | 28.27  | 33.80  | 3,689  |
|                                        | Unspecified neurological disorders                  | 33.20  | 16.72  | 27.72  | 19.07  | 5.70   | 5.30   | 18.89  | 2,062  |
|                                        | Parkinson disease                                   | 4.12   | 5.26   | 3.33   | 11.47  | 10.18  | 1.77   | 6.07   | 662    |
|                                        | Other neurological disorders                        | 4.74   | 3.85   | 6.23   | 5.63   | 2.24   | 5.30   | 4.32   | 471    |
|                                        | Epilepsy                                            | 2.89   | 0.86   | 1.61   | 1.38   | 0.81   | 0.00   | 1.17   | 128    |
|                                        | Multiple sclerosis                                  | 1.24   | 0.81   | 0.64   | 2.69   | 0.41   | 0.00   | 1.07   | 117    |
| Chronic respiratory diseases           | All Chronic respiratory diseases                    | 125.67 | 79.36  | 97.79  | 85.37  | 77.55  | 72.44  | 85.77  | 9,361  |
|                                        | Chronic obstructive pulmonary disease               | 49.79  | 45.97  | 47.93  | 43.70  | 48.85  | 45.94  | 46.29  | 5,052  |
|                                        | Unspecified chronic respiratory diseases            | 21.44  | 15.49  | 13.65  | 17.62  | 9.16   | 10.60  | 15.85  | 1,730  |
|                                        | Other chronic respiratory diseases                  | 13.81  | 2.52   | 12.57  | 6.68   | 0.20   | 0.00   | 4.85   | 529    |
|                                        | Asthma                                              | 20.21  | 3.03   | 2.69   | 3.41   | 5.09   | 1.77   | 4.66   | 509    |
|                                        | Interstitial lung disease and pulmonary sarcoidosis | 10.10  | 3.01   | 5.59   | 4.98   | 5.70   | 8.83   | 4.29   | 468    |

|                                      |                                              |         |         |         |         |         |         |         |         |
|--------------------------------------|----------------------------------------------|---------|---------|---------|---------|---------|---------|---------|---------|
|                                      | Chronic diseases of upper respiratory system | 4.33    | 4.64    | 2.36    | 0.59    | 0.00    | 0.00    | 3.62    | 395     |
|                                      | Pneumothorax                                 | 1.55    | 1.74    | 11.39   | 4.72    | 1.22    | 1.77    | 2.94    | 321     |
|                                      | Chronic respiratory diseases                 | 3.61    | 1.82    | 0.43    | 2.03    | 6.31    | 3.53    | 2.10    | 229     |
|                                      | Pneumoconiosis                               | 0.41    | 0.66    | 0.21    | 0.72    | 0.61    | 0.00    | 0.60    | 66      |
|                                      | Prothorax                                    | 0.41    | 0.48    | 0.97    | 0.92    | 0.41    | 0.00    | 0.57    | 62      |
| HIV                                  | HIV                                          | 4.23    | 0.81    | 4.41    | 4.00    | 0.41    | 1.77    | 1.85    | 202     |
| Acute respiratory infections         | acute respiratory infections                 | 62.27   | 51.94   | 85.54   | 71.94   | 46.20   | 91.87   | 58.47   | 6,381   |
| Neonatal disorders                   | Neonatal disorders                           | 6.19    | 2.28    | 15.04   | 11.86   | 0.00    | 15.90   | 5.02    | 548     |
| Poisoning and overdoses              | Poisoning and overdoses                      | 6.29    | 1.25    | 13.86   | 2.42    | 0.61    | 0.00    | 2.90    | 317     |
| Adverse effects of medical treatment |                                              | 999.59  | 984.59  | 999.89  | 999.93  | 999.59  | 1000.00 | 990.13  | 108,064 |
| Total                                | <b>Grand Total</b>                           | 4008.87 | 4152.02 | 4264.24 | 4267.77 | 4763.89 | 3978.80 | 4191.70 | 403,066 |

**eTable 6.** Number of each subtype of AEMT by year where AEMT was certified as the underlying cause of death, 1980 to 2014, both sexes combined

| Year | AEMT by type        |                                            |              |                    |                             |       | Total |
|------|---------------------|--------------------------------------------|--------------|--------------------|-----------------------------|-------|-------|
|      | Adverse drug events | Surgical and peri-operative adverse events | Misadventure | Medical management | Medical or surgical devices | Other |       |
| 1980 | 165                 | 1,970                                      | 213          | 314                | 2                           | 0     | 2,664 |
| 1981 | 210                 | 2,026                                      | 230          | 305                | 2                           | 2     | 2,775 |
| 1982 | 162                 | 2,182                                      | 241          | 241                | 0                           | 0     | 2,826 |
| 1983 | 170                 | 2,085                                      | 284          | 321                | 1                           | 1     | 2,862 |
| 1984 | 166                 | 2,034                                      | 274          | 341                | 1                           | 2     | 2,818 |
| 1985 | 179                 | 2,176                                      | 260          | 425                | 4                           | 2     | 3,046 |
| 1986 | 198                 | 2,312                                      | 321          | 413                | 0                           | 2     | 3,246 |
| 1987 | 154                 | 2,281                                      | 371          | 417                | 0                           | 2     | 3,225 |
| 1988 | 181                 | 2,234                                      | 329          | 468                | 2                           | 1     | 3,215 |
| 1989 | 149                 | 2,169                                      | 410          | 462                | 1                           | 0     | 3,191 |
| 1990 | 169                 | 2,030                                      | 418          | 414                | 6                           | 2     | 3,039 |
| 1991 | 169                 | 1,849                                      | 382          | 430                | 1                           | 1     | 2,832 |
| 1992 | 162                 | 2,034                                      | 435          | 421                | 1                           | 0     | 3,053 |
| 1993 | 201                 | 2,084                                      | 418          | 429                | 0                           | 0     | 3,132 |

|                           |              |               |              |               |              |             |                |
|---------------------------|--------------|---------------|--------------|---------------|--------------|-------------|----------------|
| 1994                      | 174          | 1,980         | 409          | 429           | 0            | 1           | 2,993          |
| 1995                      | 209          | 2,030         | 450          | 439           | 1            | 0           | 3,129          |
| 1996                      | 253          | 2,126         | 465          | 559           | 0            | 1           | 3,404          |
| 1997                      | 248          | 2,272         | 526          | 492           | 0            | 0           | 3,538          |
| 1998                      | 279          | 2,363         | 530          | 578           | 0            | 2           | 3,752          |
| 1999                      | 274          | 1,894         | 179          | 492           | 299          | 12          | 3,150          |
| 2000                      | 292          | 2,166         | 183          | 502           | 300          | 27          | 3,470          |
| 2001                      | 308          | 2,087         | 177          | 465           | 336          | 14          | 3,387          |
| 2002                      | 282          | 2,030         | 169          | 434           | 313          | 22          | 3,250          |
| 2003                      | 362          | 1,992         | 166          | 425           | 352          | 26          | 3,323          |
| 2004                      | 398          | 1,865         | 171          | 495           | 335          | 26          | 3,290          |
| 2005                      | 371          | 1,760         | 147          | 451           | 309          | 58          | 3,096          |
| 2006                      | 379          | 1,626         | 167          | 436           | 295          | 45          | 2,948          |
| 2007                      | 378          | 1,721         | 155          | 461           | 293          | 56          | 3,064          |
| 2008                      | 465          | 1,646         | 129          | 450           | 304          | 46          | 3,040          |
| 2009                      | 434          | 1,741         | 142          | 417           | 325          | 35          | 3,094          |
| 2010                      | 450          | 1,625         | 134          | 411           | 282          | 38          | 2,940          |
| 2011                      | 435          | 1,704         | 112          | 484           | 277          | 36          | 3,048          |
| 2012                      | 434          | 1,671         | 103          | 514           | 291          | 37          | 3,050          |
| 2013                      | 418          | 1,903         | 112          | 470           | 305          | 38          | 3,246          |
| 2014                      | 422          | 1,725         | 94           | 458           | 275          | 31          | 3,005          |
| <b>Total: 1980-2014</b>   | <b>9,700</b> | <b>69,393</b> | <b>9,306</b> | <b>15,263</b> | <b>4,913</b> | <b>566</b>  | <b>109,141</b> |
| <b>Total %: 1980-2014</b> | <b>8.9%</b>  | <b>63.6%</b>  | <b>8.5%</b>  | <b>14.0%</b>  | <b>4.5%</b>  | <b>0.5%</b> |                |

**eTable 7.** Rate of occurrence of AEMT in the cause-of-death chain by other cause category (per 1,000 deaths in each category) when AEMT was NOT certified as the underlying cause of death, 1980 to 2014, both sexes combined

| Underlying causes of death               | AEMT by type        |                                            |              |                    |                             |             | Any type of AEMT per 1000 deaths in category | Death totals with AEMT in cause-of-death chain, but not underlying cause. |
|------------------------------------------|---------------------|--------------------------------------------|--------------|--------------------|-----------------------------|-------------|----------------------------------------------|---------------------------------------------------------------------------|
|                                          | Adverse drug events | Surgical and peri-operative adverse events | Misadventure | Medical management | Medical or surgical devices | Other       |                                              |                                                                           |
| External cause of Injuries               | 29.76               | 5.69                                       | 115.29       | 51.74              | 0.47                        | 0.03        | 202.98                                       | 1,028,430                                                                 |
| Chronic infectious disease               | 12.57               | 34.97                                      | 0.34         | 3.71               | 0.17                        | 0.18        | 51.95                                        | 3,944                                                                     |
| Congenital birth defects                 | 6.55                | 39.17                                      | 0.50         | 2.55               | 0.84                        | 0.07        | 49.68                                        | 18,940                                                                    |
| Digestive diseases                       | 9.85                | 35.79                                      | 0.69         | 2.51               | 0.17                        | 0.39        | 49.40                                        | 141,744                                                                   |
| Musculoskeletal disorders                | 20.80               | 12.36                                      | 0.26         | 2.74               | 1.63                        | 0.74        | 38.53                                        | 10,016                                                                    |
| acute infectious diseases                | 13.09               | 12.91                                      | 4.07         | 7.08               | 0.27                        | 0.24        | 37.66                                        | 12,353                                                                    |
| Urogenital diseases                      | 5.96                | 20.62                                      | 0.33         | 5.55               | 0.29                        | 0.10        | 32.86                                        | 19,413                                                                    |
| Endocrine and metabolic disorders        | 11.37               | 16.90                                      | 0.54         | 2.80               | 0.32                        | 0.74        | 32.68                                        | 16,848                                                                    |
| Blood Disorders                          | 9.03                | 5.76                                       | 0.45         | 10.42              | 0.30                        | 1.90        | 27.86                                        | 4,053                                                                     |
| Sense organ diseases                     | 10.87               | 5.43                                       | 0.00         | 10.87              | 0.00                        | 0.00        | 27.17                                        | 5                                                                         |
| Diarrheal diseases                       | 14.13               | 8.76                                       | 0.20         | 2.00               | 0.72                        | 0.26        | 26.06                                        | 3,013                                                                     |
| Impossible cause for death               | 11.51               | 11.04                                      | 0.16         | 1.49               | 1.29                        | 0.02        | 25.51                                        | 25,621                                                                    |
| Skin Diseases                            | 8.70                | 12.64                                      | 0.20         | 2.42               | 0.33                        | 0.13        | 24.42                                        | 3,122                                                                     |
| Maternal disorders                       | 6.08                | 11.93                                      | 1.59         | 2.95               | 0.68                        | 0.00        | 23.23                                        | 409                                                                       |
| Mental disorders                         | 19.05               | 1.62                                       | 0.32         | 0.83               | 0.12                        | 0.20        | 22.14                                        | 7,922                                                                     |
| Kidney disease                           | 3.01                | 9.02                                       | 0.28         | 5.79               | 0.27                        | 0.25        | 18.61                                        | 29,664                                                                    |
| Nutritional deficiencies                 | 7.52                | 6.24                                       | 0.22         | 3.59               | 0.22                        | 0.19        | 17.98                                        | 2,121                                                                     |
| Chronic intermediate and immediate cause | 5.89                | 6.96                                       | 0.14         | 1.83               | 0.17                        | 0.04        | 15.03                                        | 11,552                                                                    |
| Cardiovascular diseases                  | 3.25                | 9.17                                       | 0.16         | 0.64               | 1.10                        | 0.06        | 14.39                                        | 434,126                                                                   |
| Neoplasm                                 | 4.03                | 5.69                                       | 0.09         | 2.93               | 0.05                        | 0.35        | 13.14                                        | 246,659                                                                   |
| Diabetes and diabetes related disorders  | 3.18                | 7.84                                       | 0.09         | 1.56               | 0.20                        | 0.05        | 12.91                                        | 24,894                                                                    |
| Acute intermediate and immediate cause   | 3.35                | 4.66                                       | 0.17         | 1.00               | 0.51                        | 0.13        | 9.82                                         | 29,221                                                                    |
| Neurological disorders                   | 6.82                | 1.58                                       | 0.07         | 0.84               | 0.10                        | 0.02        | 9.43                                         | 37,274                                                                    |
| Chronic respiratory diseases             | 4.11                | 3.59                                       | 0.13         | 1.19               | 0.11                        | 0.04        | 9.16                                         | 39,276                                                                    |
| HIV                                      | 3.09                | 0.85                                       | 1.62         | 1.24               | 0.06                        | 0.43        | 7.29                                         | 3,653                                                                     |
| Acute respiratory infections             | 4.51                | 1.23                                       | 0.06         | 0.61               | 0.03                        | 0.03        | 6.47                                         | 15,346                                                                    |
| Poisoning and overdoses                  | 3.45                | 0.84                                       | 0.21         | 0.72               | 0.05                        | 0.02        | 5.29                                         | 3,024                                                                     |
| Neonatal disorders                       | 0.82                | 0.95                                       | 0.13         | 0.50               | 0.00                        | 0.05        | 2.45                                         | 1,318                                                                     |
| <b>Grand Total</b>                       | <b>6.02</b>         | <b>8.11</b>                                | <b>7.45</b>  | <b>4.79</b>        | <b>0.54</b>                 | <b>0.15</b> | <b>27.07</b>                                 | <b>2,173,961</b>                                                          |

This technical appendix is reproduced and slightly modified from the most up-to-date methods related to cause-of-death modelling used in the GBD 2016, published in the *Lancet*.<sup>1</sup>

## eMethods.

### Section 1: Causes of death modelling methods (CODEm)

#### 1.1 CODEm

##### 1.1.1 Overview of method

Cause of death ensemble modelling (CODEm) is the framework used to model most cause-specific death rates in the GBD.<sup>2</sup> It relies on four key components. First, all available data are identified and gathered to be used in the modelling process. Though the data may vary in quality, they all contain some signal of the true epidemiological process. Second, a diverse set of plausible models are developed to capture well-documented associations in the estimates. Using a wide variety of individual models to create an ensemble predictive model has been shown to outperform techniques using only a single model both in cause of death estimation<sup>2</sup> and in more general prediction applications.<sup>3,4</sup> Third, the out-of-sample predictive validity is assessed for all individual models, which are then ranked for use in the ensemble modelling stage. Finally, differently weighted combinations of individual models are evaluated to select the ensemble model with the highest out-of-sample predictive validity.

For some causes (see, for example, lower respiratory infections), there is evidence that the relationship between covariates and death rates might differ between children and adults. Separate models are therefore run for different age ranges when applicable. Additionally, separate models are developed for countries with extensive, complete, and representative vital registration (VR) for every cause to ensure that uncertainty can better reflect the more complete data in these locations.

##### 1.1.2 Model pool development

Because many factors may covary with any given cause of death, a range of plausible statistical models are developed for each cause. In the CODEm framework, four families of statistical models are used: linear mixed effects regression (LMER) models of the natural log of the cause-specific death rate, LMER models of the logit of the cause fraction, spatiotemporal Gaussian process regression (STGPR) models of the natural logarithm of the cause-specific death rate, and ST-GPR models of the logit of the cause fraction (see the 2x2 table in Foreman et al).<sup>2</sup> For each family of models, all plausible relationships between covariates and the response variable are identified. Because all possible combinations of selected covariates are considered for each family of models, multicollinearity between covariates may produce implausible signs on coefficients or unstable coefficients. Each combination is therefore tested for statistical significance (covariate coefficients must have a coefficient with p-value < 0.05) and plausibility (the coefficients must have the directions expected based on the literature). Only covariate combinations meeting these criteria are retained. This selection process is run for both cause fractions and death rates, then ST-GPR and LMER-only models are created for each set of covariates. For a detailed explanation of the covariate selection algorithm, see Foreman et al 2012.<sup>2</sup>

##### 1.1.3 Testing model pool on 15% sample

The performance of all models (individual and ensemble) is evaluated using out-of-sample predictive validity tests. Thirty percent of the data are excluded from the initial model fits. These individual model fits are evaluated and ranked using half of the excluded data (15% of the total), then used to construct the ensembles based on their performance. Data are held out from the analysis based on the cause-specific missingness patterns for ages and years across locations. Out-of-sample predictive validity testing is repeated 20 times for each model, which has been shown to produce stable results.<sup>2</sup> These performance tests include the RMSE

for the log of the cause-specific death rate, the direction of the predicted versus actual trend in the data, and the coverage of the predicted 95% UI.

#### 1.1.4 Ensemble development and testing

The component models are weighted based on their predictive validity rank in order to determine their contribution to the ensemble estimate. The relative weights are determined both by the model ranks and by a parameter  $\psi$ , whose value determines how quickly the weights taper off as rank decreases. The distribution of  $\psi$  is described in more detail in Foreman et al 2012.<sup>2</sup> A set of ensemble models is then created using the weights constructed from the combinations of ranks and  $\psi$  values. These ensembles are tested using the predictive validity metrics described in Section 1.1.3 on the remaining 15% of the data, and the ensemble with the best performance in out-of-sample trend and RMSE is chosen as the final model.

#### 1.1.5 Final estimation

Once a weighting scheme has been chosen, 1,000 draws are created for the final ensemble, with the number of draws contributed by each model proportional to its weight. The mean of the draws is used as the final estimate for the CODEm process, and a 95% uncertainty interval (UI) is created from the 0.025 and 0.975 quantiles of the draws. The validity of the UI can be checked via its coverage of the out-of-sample data; ideally, the 95% UI would capture 95% of these data. Higher coverage suggests that the UIs are too large, and lower coverage suggests overfitting.

#### 1.1.6 Selection of causes for which CODEm is used

CODEm is used to model 205 causes, described in detail elsewhere. However, it is unsuitable for use in modelling certain causes, including those with very low death counts, those where cause-specific death record availability is inadequate, or those for which there are marked biases or variability for cause of death certification over time that cannot be fully accounted for with the current garbage code redistribution algorithms.

#### 1.1.7 Model-specific covariates

A table of CODEm covariates used, level of the covariate, and expected direction of the covariate can be found in eTable3.

### eReferences.

1. Naghavi M, Abajobir AA, Abbafati C, et al. Global, regional, and national age-sex specific mortality for 264 causes of death, 1980–2016: a systematic analysis for the Global Burden of Disease Study 2016. *The Lancet*. 2017;390(10100):1151-1210 (appendix, p33).
2. Foreman KJ, Lozano R, Lopez AD, Murray CJ. Modeling causes of death: an integrated approach using CODEm. *Popul Health Metr*. 2012; 10:1.
3. Bell RM, Koren Y. Lessons from the Netflix Prize Challenge. *SIGKDD Explor Newsl*. 2007; 9: 75–79.
4. Bell RM, Koren Y, Volinsky C. All together now: A perspective on the NETFLIX PRIZE. *CHANCE*. 2010; 23: 24–24.
